# Purging of deleterious variants in Italian founder populations with extended autozygosity

---

5 Massimiliano Cocca<sup>1</sup>, Marc Pybus<sup>2</sup>, Pier Francesco Palamara<sup>3</sup>, Erik Garrison<sup>4</sup>, Michela Traglia<sup>6</sup>, Cinzia F Sala<sup>6</sup>, Sheila Uivi<sup>5</sup>, Yaşin Memari<sup>4</sup>, Anja Kolb-Kokocinski<sup>4</sup>, Richard Durbin<sup>4</sup>, Paolo Gasparini<sup>1,5</sup>, Daniela Toniolo<sup>6</sup>, Nicole Soranzo<sup>4,7</sup>, Vincenza Colonna<sup>8\*</sup>

10

1. Department of Medical, Surgical and Health Sciences, University of Trieste, 34100 Trieste, Italy

2. Institut de Biologia Evolutiva (UPF-CSIC), Universitat Pompeu Fabra, Barcelona, Spain, 08003

3. Harvard T. H. Chan School of Public Health, 02115 Boston, MA.

4. Human Genetics, Wellcome Trust Sanger Institute, Genome Campus, Hinxton, CB10 1HH

15

5. Medical Genetics, Institute for Maternal and Child Health IRCCS "Burlo Garofolo", 34100 Trieste, Italy

6. Division of Genetics and Cell Biology, San Raffaele Scientific Institute, Milano, Italy

7. Department of Haematology, University of Cambridge, Hills Rd, Cambridge CB2 0AH

8. National Research Council, Institute of Genetics and Biophysics, Naples, Italy

20

\*Correspondence to:

Vincenza Colonna

Consiglio Nazionale delle Ricerche

25 Istituto di Genetica e Biofisica "Adriano Buzzati-Traverso"

Via Pietro Castellino 111

80131 Napoli - IT

tel +39 081 6132 254

30

fax +39 081 6132 706

email [vincenza.colonna@igb.cnr.it](mailto:vincenza.colonna@igb.cnr.it)

## Abstract

35 Purging through inbreeding defines the process through which deleterious alleles  
can be removed from populations by natural selection when exposed in homozygosis  
through the occurrence of consanguineous marriage. In this study we carried out  
low-read depth (4-10x) whole-genome sequencing in 568 individuals from three  
Italian founder populations, and compared it to data from other Italian and European  
40 populations from the 1000 Genomes Project. We show depletion of homozygous  
genotypes at potentially detrimental sites in the founder populations compared to  
outbred populations and observe patterns consistent with consanguinity driving the  
accelerated purging of highly deleterious mutations.

## 45 Introduction

Population genetics theory and empirical evidence from model organisms predict  
that deleterious variants with dominant effect are quickly purged by selection, at a  
rate proportional to the effective population size and their fitness effect<sup>1,2,3,4,5,6,7</sup>. In  
a strictly recessive model, deleterious variants carried in heterozygous state are  
50 expected to conform to neutral modes of evolution. Therefore, for equal effect sizes  
recessive models allow for higher frequencies of deleterious variants compared to  
dominant ones. In other words, recessive variants are less easily purged by selection  
and remain in the populations at low frequency (mostly in heterozygosis). These  
recessive variants provide a significant contribution to the genetic load of the  
55 population as there is less opportunity for a detrimental phenotype caused by  
recessive mutations to manifest, compared to dominant phenotypes.

Empirical and theoretical evidence from recent studies suggest that deleterious variants, which are rare in the general population, are enriched in human populations that experienced a founder effect<sup>7,8,9,10</sup>. However a debate exists about whether this is due to reduced efficacy of natural selection or other causes<sup>11,12</sup> and little is known about how consanguinity affects population genetic load.

Consanguineous marriages result in substantial deviation from Hardy-Weinberg equilibrium due to increased autozygosity, which can cause deleterious recessive variants to be present in a homozygous state. While autozygosity is associated with higher rate of disorders (congenital, late onset, infertility, miscarriage, infant mortality and morbidity) in consanguineous populations<sup>13,14,15,16,17</sup>, it also provides an opportunity for selection to act by purging exposed deleterious phenotypes, eventually reducing the fraction of homozygous deleterious genotypes<sup>18</sup>. Purging causes less fit individuals to be eliminated, ultimately increasing the population's fitness. Indeed, in some species inbreeding caused by a bottleneck has been shown to have beneficial effects, for instance promoting species invasiveness in ladybirds<sup>19</sup> or removing highly deleterious variants in mountain gorillas<sup>20</sup>. In humans, consanguineous couples experience higher fertility than non-consanguineous couples<sup>15,21,22</sup>, but this has been associated with causes other than purging, such as social factors (e.g. younger maternal age at first birth), reproductive compensation<sup>15,23</sup>, negative effects of outbreeding (break-up of co-adapted gene complexes, and the increase of maternal-foetal incompatibilities)<sup>22</sup>. Little is known about how inbreeding might play a role in the improved fecundity of consanguineous couples.

In this study we investigated whether homozygosis has had a role in the purging of deleterious mutations in three Italian founder populations with different demographic histories<sup>23,24,25</sup> by comparing them with with outbred Italian and

European populations. We show evidence for a depletion of homozygous genotypes at putatively detrimental sites in all the three populations. The presence of this  
85 effect in multiple founder populations with high rates of consanguinity suggests that inbreeding might have had a role in accelerating purging of deleterious mutations. We conclude that purging through inbreeding is possible in human populations, and this study demonstrates it for the first time.

## Results

### 90 **Whole genome sequence of isolates identified 21M variable sites, one seventh of which are novel**

We carried out low-read depth whole-genome sequencing (average 6x, Table S1) in 568 uselected individuals from three populations from the Italian network of genetic isolates (INGI), namely Val Borbera (VBI), Carlantino (CAR) and Friuli Venezia  
95 Giulia (FVG). Of these, FVG is further subdivided in 4 different villages, namely Erto (FVG-E), Illegio (FVG-I), Resia (FVG-R) and Sauris (FVG-S) (Figure 1a and Table S2). After stringent quality control (Methods), we identified a total of 21,244,190 variable sites. We further compared genetic variability of the isolates with populations representative of the general Italian and European population, namely 98 Tuscans  
100 (TSI) and 85 Utah Residents with Northern and Western European ancestry (CEU) from the 1000 Genomes Project (TGP)<sup>26,27</sup> Phase 1 data set (Figure 1a). The isolate call sets were generated using the same variant calling and QC pipelines employed by the TGP project, so the two variant datasets were merged to generate a final set of 46,281,641 variable sites including sites variable both in isolates and TGP. To  
105 verify the validity of this approach, we estimated concordance of genotypes at 298k variable sites on chromosome 22 within the merged call set with those obtained by simultaneously calling isolates and the TGP. We found a median non-reference

genotype discordance of 1.55% and 3.8% for SNPs and INDELS, respectively (Table S3), suggesting that merging the two call sets is a viable approach.

110 Variable sites discovered in the three isolates were classified as 'private' if  
variable in at least one isolates but not variable in both CEU and TSI, and 'shared' if  
variable in at least one isolate and CEU or TSI. In a set of 46 random individuals per  
populations private sites represent on average the 13% of the variability in the  
isolates (Figure 1b, Table S4). The high incidence of newly-discovered ('private')  
115 variants highlights the importance of carrying out variant discovery in different  
populations for comprehensively characterising human genetic variability. Novel  
private variants tend to be enriched for missense mutations in all isolates (Figure 1c,  
two-sample Kolmogorov-Smirnov test p-value  $< 10^{-11}$ , Table S5): in many  
individuals the missense/synonymous ratio is  $> 1$  at private sites, whereas at shared  
120 sites this ratio has very small variance and is close to one. This trend is expected in  
expanding populations<sup>28</sup> and has been observed in other founder populations<sup>7</sup>.

The incidence of rare variants at private sites (Minor Allele Frequency,  
MAF $< 0.03$ , first two bins in Figure 1d and Figure S1) was at least three times higher  
compared compared to shared sites in all populations considered (odds ratio $> 3$ , p-  
125 values  $< 2.2 \times 10^{-16}$ , Table S6). When comparing incidence of rare private variants  
between isolates and reference populations, we observed a trend of lower incidence  
of rare variants in FVG villages compared to CEU and TSI (Wilcoxon rank-sum test p-  
value  $< 2.2 \times 10^{-16}$ ) suggesting a loss of alleles in FVG due to downsampling during a  
recent bottleneck followed by isolation. In contrast, the rate of rare private variants  
130 in VBI and CAR is significantly higher than in CEU and TSI (Wilcoxon rank-sum test  
p-value  $< 2.2 \times 10^{-16}$ ), suggesting a recent population expansion in these two  
populations.

We further investigated genetic relationship among individuals of the three isolates, TSI and CEU using a random set of 281k variable chromosome 22 sites spanning all frequency ranges. A previous exploration of VBI and FVG was limited to low-resolution SNP array data (not informative for rare, private and novel genetic variation) 23,24, while the genetic structure of CAR has not been described before. In a principal component analysis, two FVG villages (FVG-R and FVG-S) appeared to be distinct from the other populations along the first three components. Further, VBI and CAR separated from CEU and TSI on the fourth component ( Figure S2). In admixture analyses, FVG-R and FVG-S separated from other populations already at K=4 clusters, although the most likely number of clusters was 10 (Figure S3). These results confirm earlier results based on SNP array data from the entire FVG sample<sup>24</sup>, and are thus not related to the sampling strategy used in this study. Because of this sub-structuring, when relevant FVG villages were considered separately for subsequent analyses. CAR, described here for the first time, clusters with VBI and other reference populations (TSI and CEU) along the first two components and with VBI along the 3<sup>rd</sup> and 4<sup>th</sup> component (Figures S2 and S3).

### **Long term isolation and diffused homozygosity in isolated populations**

The historical isolation experienced by the INGI, FVG and CAR populations is expected to result in greater genetic homogeneity and consistent homozygosity, as the result of systematic inbreeding, compared to reference populations. We investigated this hypothesis using several approaches.

First, we calculated relatedness between pairs of individuals using two independent measures, namely pedigree-based and genomic-based kinship. Pedigree based kinship represents the expected fraction of the genome shared that is identical by descent (IBD) and was calculated from genealogical records dating

back to the 17th century. Genomic kinship evaluates the probability of sharing genome identical by descent and was calculated using genetic data. Pedigree- and genomic-based kinship values were highly correlated (Figure S4 ). In FVG villages the resolution of pedigree-based kinship was poor because genealogies are incomplete, therefore we concentrated on genomic based-kinship and referred to pedigree-based kinship to confirm first-degree relatedness of couples that were excluded from the analyses. Genomic-based kinship values tended to be significantly higher in isolates compared to reference populations (Figure 2 dark blue, FigureS5 and Table S7; two-sample Kolmogorov-Smirnov test p-values  $<0.0003$ , details in Table S8 ). The kinship distribution were highly skewed towards low values in all cases, however maximum values were in the range of 1<sup>st</sup> degree relationships for isolates, compared to  $<3^{\text{rd}}$  degree in reference populations. When removing one individual per pair from pairs related to 1<sup>st</sup> degree according to pedigree-based kinship, we still observed genomic-kinship values in the range of 1<sup>st</sup> degree in isolates (Figure 2, light blue). Overall these results not only show that individuals from isolates tend to be more consanguineous than reference populations, but also suggest that consanguinity has systematically occurred in these populations in historical times, and ancestors of 2<sup>nd</sup> and 3<sup>rd</sup> degree relatives were in turn the result of consanguineous relationships. Because of this extended consanguinity, in subsequent analyses we used a set of 500 individuals where one random individual from pairs with 1<sup>st</sup> degree relationships has been retained (Table S2. Figure S4).

Having assessed diffused consanguinity in the isolates, we next quantified genome segments which were IBD among individuals within populations in 46 samples per population. We assessed 46 samples per population, where we identified IBD segments between pairs of individuals. In Figure 3a we report the distributions of total extension of IBD genome (i.e. the sum of single segments).

*Cocca et al. - Purging of deleterious variants in founder populations*

While there was no significant difference between isolates and CEU or TSI in the total  
185 IBD distributions (two-sample Kolmogorov-Smirnov test p-value >0.01, Table S8)  
FVG villages displayed higher total IBD sharing on average (Figure S6 and Table S9).  
These differences were more evident when contrasting cumulative distributions of  
total IBD (Figure 3b, figures in Tables S9): in FVG villages 95% of the individuals  
shared 337-461(+/-85-123)Mb compared to 122-157(+/-8-45)Mb in other isolates  
190 and reference populations. Considering an accessible genome size of 2.5Gb<sup>27</sup>, this  
would be equivalent to say that individuals in FVG villages share between 13% and  
18% of their genomes, *versus* 5-6% in other populations, corroborating evidence for  
extended consanguinity in the isolates.

Finally, we investigated allele sharing within an individual by identifying genomic  
195 segments with contiguous genotypes in homozygosity (Runs Of Homozygosity, ROH)  
in each individual. We report in Figure 3c the distributions of the total length of ROH  
(i.e. the sum of single segments) per individual. With the exception of CAR, ROH  
extension was significantly higher in isolates compared to CEU and TSI (see two-  
sample Kolmogorov-Smirnov test p-values given in Table S9), suggesting increased  
200 homozygosity in isolates. This is also evident when comparing cumulative  
distributions of total ROH in 46 randomly selected individuals per population (Figure  
3d, figures in Table S9): 95% of individuals in FVG villages and VBI had between 163-  
209(+/-30-43)Mb of genome in homozygosity compared to less than <100(+/-10-  
15)Mb in the outbred reference populations. These figures translate respectively in  
205 5-8% of the genome in homozygosity in isolates (except CAR) compared to 3-4% in  
CEU, TSI.

When ROHs single segments were classified according to their length<sup>29</sup>, we  
observed a trend of prevalence of medium and long ROHs in isolates (and especially



*Cocca et al. - Purging of deleterious variants in founder populations*

FVG-R and FVG-S) compared to CEU and TSI (Figure S7). This condition is consistent  
210 with the presence of extended consanguinity or very recent admixture; both cases  
apply to the isolates under study here, for which isolation (either geographical or  
linguistic) was a past condition that is no longer met.

### **Selection against highly deleterious mutations has been more effective in isolates compared to reference populations**

215 To test the hypothesis that autozygosity contributes to the purging of deleterious  
mutations through exposure of detrimental alleles to purifying selection, we  
determined the incidence of homozygous detrimental genotypes and measured the  
efficiency of purifying selection in isolates compared to reference populations.

For this analysis we used derived alleles information in 46 samples at three set of  
220 sites where the derived allele causes missense, synonymous, or loss of function  
(LoF)<sup>30</sup> consequences. Alleles determining missense, and in minor measure  
synonymous<sup>31</sup>, consequences introduce changes to the coded protein that might  
alter the protein structure, whereas LoF mutation completely disrupts the protein  
function. Only shared sites were considered for this analysis both to avoid technical  
225 bias due to variant calling and because private sites are generally too young to  
observe the effect of selection. Rather than assessing the overall burden of isolates,  
to which private site will be major contributors, we are indeed interested in asking if  
purging due to inbreeding has occurred in isolates.

We observed significantly fewer derived alleles counts per individual in FVG and  
230 VBI compared to reference populations at all sets of variants (Figure 4a, Wilcoxon  
rank sum test p-values in Table S10), suggesting that this might be a general effect  
of the demography, independent from putative detrimentality of alleles and

compatible with the general loss of rare alleles due to bottlenecks and genetic drift. We then evaluated how often putatively detrimental alleles are found in  
235 homozygosity by counting the number of homozygous genotypes per individuals at missense, synonymous and LoF sites, normalized for the number of homozygous genotypes at intergenic sites to avoid population bias. Isolates had significantly higher rates of homozygous genotypes at mildly deleterious sites (missense and synonymous, Figure 4b) compared to reference populations, in accordance with the  
240 general homozygosity trend reported in the previous section. However, at highly deleterious sites (LoF) the rate of homozygosity was comparable between isolates and reference populations (with the exception of FVG-E and FVG-R) indicative of an overall depletion of homozygous genotypes at these sites in isolates. This depletion of deleterious alleles in homozygosity is compatible with the hypothesis of purging  
245 due to inbreeding in isolates.

We therefore used a recently proposed metric ( $R_{X/Y}$ )<sup>8,32</sup> to assess whether selection has been more effective in isolates compared to reference populations. The metric  $R_{X/Y}$  contrasts frequencies of allele between pairs of populations and measures their accumulation in one population compared to the other: a value of 1  
250 indicates that the two populations have comparable number of mutations per individual, whereas values lower than 1 indicate a depletion in population X and values higher than 1 indicate a depletion in population Y. We compared  $R_{X/Y}$  at missense, synonymous and LoF variants in isolates and reference populations. The load of moderately deleterious (missense and non-synonymous) mutations in  
255 isolates was higher than in reference populations, consistent with less efficient selection and stronger drift in the former (Figure 5). However, the opposite was true of variation at LoF sites (with the exception of FVG-S), with a possible cause being

the purging effect of inbreeding alongside strong selection coefficients for highly disruptive LoF mutations.

260

### **Simulations support the observed depletion of highly deleterious homozygous genotypes**

We evaluated expectations to observe purging in simulated data under a range  
265 of demographic scenarios, natural selection intensities and models. A population isolate was simulated to arise from an European-like population at 160, 60 or 20 generations ago (generation time 25 years), and to evolve to present time under five demographic models (continued bottleneck, serial founder effect, bottleneck plus linear expansion, bottleneck plus instantaneous expansion and bottleneck plus linear  
270 reduction; Figure S8) and three different values of average kinship (0, 0.002 and 0.1). We forward-in-time simulated genomic data by mimicking features of exomes spanning 115 kbp (Methods). Mutations were assumed to be deleterious  $\frac{3}{4}$  of the time in exons and  $\frac{1}{2}$  in UTRs under six selection coefficients ( $s = -0.2, -0.1, -0.05, -0.01, -0.005$  and  $-0.001$ ). Each scenario was replicated 500 times. We found purging  
275 to be more effective in the bottleneck plus expansion (Figure S9) and thus for this model we further explored a range bottleneck intensities (effective population size,  $N_e$ , during the bottleneck = 15, 25 and 50 and bottleneck duration 1 to 25 generations in steps of 5, Table S11). Demographic parameter choice was a compromise between computational feasibility and similarity to the demography of  
280 the isolates under study, its main purpose being to explore properties of purging rather than to perfectly fit isolate demography.

Purging was calculated in a sample of 50 individuals as the fold change between present and past (at founding event) number of recessive deleterious homozygous genotypes per individual. A negative fold change described a reduction of deleterious homozygous genotypes expected in the case of purging. Results in Figure 6 (also see Figure S10) show that: (i) under neutrality ( $s = 0$ ) no purging is seen in all three models; (ii) for mildly deleterious mutations ( $s = 0.01$ ) purging is almost complete under dominance, moderate for additive models but not happening under recessive models and (iii) for highly deleterious mutations ( $s = 0.1$ ) purging of homozygous recessive deleterious genotypes is seen also under recessive models.

Overall, these simulations suggest that the selection coefficient and dominance model have a major effect on purging and that purging is possible for highly deleterious recessive mutations. While it is difficult to make assumptions on the inheritance model of missense and synonymous variants, a recessive model and a strong selection coefficient are highly plausible for LoF<sup>30</sup>. We therefore conclude that simulations support the observed depletion of highly deleterious homozygous genotypes observed at LoF sites. Nevertheless, our set of simulations does not explain the role of consanguinity as the effect of kinship is negligible.(Figure 6). This may be due to the imperfect fit of the demographic parameters used for simulations to the isolates studied here. A more comprehensive analysis will be required to fully understand this aspect.

### **Some isolates experienced genetic drift and a recent decrease of the effective population size**

A decrease in the number of deleterious mutation could more generally be the result of loss of rare variants following a bottleneck, a founder event, or isolation. We thus investigated to what extent genetic drift acted on the populations in this study.

We used a method based on inference from genomic segments IBD that enables exploring very recent fluctuations in effective population size<sup>33</sup>. Low coverage and computational phasing are likely to affect the accuracy of IBD detection methods, occasionally breaking down long IBD segments into shorter ones and thus potentially creating the artefactual effect of a population expansion. Despite this potential confounding, our analysis displayed clear patterns of overall lower effective population size estimates in isolates compared to reference populations (Figure 7). Indeed in the last fifty generations (last ~1500 years in Figure 7) we observed a population size contraction in FVG villages compared to CEU and TSI, which appear unaffected by the very recent trends towards expansion of other European populations<sup>28,34</sup>. Such abundant sharing of long haplotypes co-inherited from recent common ancestors during a recent population contraction provides further evidence for genetic drift that extended until the very recent centuries in these isolated groups compared to the reference populations. The same trend of contraction is not apparent in CAR and VBI, that follow TSI and CEU, however with smaller effective population sizes. We therefore conclude that genetic drift might have contributed to reducing deleterious mutations in FVG villages, while this has not been the case in VBI and CAR.

## 325 **Discussion**

Inbreeding consists of mating between closely related individuals. Chromosome pairs of inbred offspring share segments that are identical by descent more often than expected by chance, and consequently large portions of the genome in inbred individuals are in homozygosis. Inbred offspring undergo inbreeding depression, the phenomenon by which detrimental mutations increase in frequency in a population, with consequent reduction in overall fitness. However, in the long term the rise of detrimental mutations frequency is offset by an increased efficiency of selection in

*Cocca et al. - Purging of deleterious variants in founder populations*

removing individuals carrying these mutations. Therefore, in the long term inbreeding can have beneficial effects.

In this study we demonstrate that consanguinity results in purging of deleterious mutations in  
335 isolated human populations. Analysis of whole genome data from three isolated populations  
demonstrated the occurrence of (i) diffused consanguinity and extended regions of autozygosity; (ii)  
small effective population sizes until recent times; (iii) depletion of homozygous genotypes of  
putatively deleterious mutations and (iv) more effective selection against detrimental mutations in  
comparison to outbred Italian and European populations.

340 This last observation is in contrast with theoretical prediction, as selection is less efficient in  
populations with small effective population size. We thus investigated plausible explanations  
underlying the observed purging. Our simulations shows that a reduction of highly deleterious  
mutations in homozygosis is possible under a range of demographic and evolutionary conditions  
even if they do not fully clarify the role of consanguinity. Genetic drift as a consequence of founder  
345 effects and reduced effective population size is another possible cause. Bottlenecks cause a  
reduction of segregating sites and a loss of rare variants, including deleterious mutations, as they  
tend to be rare. According to our data, genetic drift has certainly played a major role in FVG as the  
effective population size of villages is very small, but this does not hold for other isolates and  
therefore the patterns observed cannot be explained by selection and drift alone. All isolates have  
350 extended regions of the genome in homozygosity as a result of isolation and kin marriages, and we  
cannot exclude that consanguinity is likely to have played a major role in accelerating the process of  
selection in FVG and VBI through the exposure of the deleterious mutations in homozygosis.

Our observations are compatible with the effect of purging of deleterious mutations carried in  
homozygosis and our conclusions are supported by the observation reported in literature that in

*Cocca et al. - Purging of deleterious variants in founder populations*

355 cases of systematic inbreeding due to non-random mating (as is the case of small consanguineous  
populations), purging can work even for mild deleterious alleles as opposed to cases of panmictic  
inbreeding (i.e. inbreeding due to finite size of the populations) where purging is effective only for  
lethal or semilethal alleles<sup>35</sup>.

Consanguineous populations represent a model for the effects of systematic  
360 inbreeding. Beside social constrains, consanguinity can naturally occur for several  
reasons, including geographical, linguistic and religious isolation. Recently there has  
been a great interest in exploring the genetic load in populations with different  
demographic history. Consanguineous populations in this study complement the  
range of demographic scenarios and here we demonstrate that they provide an  
365 excellent model study to understand the interplay between selection, genetic drift  
and homozygosis in determining the genetic load of human populations. .

## Methods

### Samples individuals and data generation

Low coverage whole genome sequence was generated in for 568 individuals  
370 belonging to the INGI network. Individuals are from Italian populations form North-  
West (Val Borbera<sup>25</sup>, 225 samples), North-East (Friuli Venezia Giulia<sup>24</sup>, 250 samples )  
and South-West (Carlantino<sup>24</sup>, 93 samples). Sequencing was carried out using  
Illumina technology (Genome Analyzer and HiSeq 2000) at the Wellcome Trust  
Sanger Institute and Beijing Genomics Institute (54 samples from FVG cohort). Data  
375 coverage was 4-10X (Table S2).

The study was reviewed and approved by the following Ethical Committees:  
Ethical committee of the San Raffaele Hospital and of the Piemonte Region (VBI),

Ethics approval was obtained from the Ethics Committee of the Burlo Garofolo children hospital in Trieste (FVG), the local administration of Carlantino, the Health  
380 Service of Foggia Province, Italy, and ethical committee of the IRCCS Burlo-Garofolo of Trieste (CAR). Written informed consent was obtained from every participant to the study and all methods were carried out in accordance with the approved guidelines (Declaration of Helsinki of the World Medical Association).

### **Data processing, variant calling**

385 Genotype calls were produced for each population separately using the following pipeline. Samtools mpileup (v. 0.1.19)<sup>36</sup> was used for multisample genotype calling (parameter set: -EDVSp -C50 -m3 -F0.2 -d 40). Variant Quality Score Recalibrator (VQSR) filtering was applied to the raw call data with GATK v.2.5<sup>37</sup> through VariantRecalibrator module separately for SNVs and INDELS. The filter creates a  
390 Gaussian Mixture Model by looking at annotations values over a high quality subset of the input call set and then evaluate all input variants. For SNVs we used the following parameters: I) Annotations: QD, DP, FS, HaplotypeScore, MQRankSum, ReadPosRankSum, InbreedingCoeff II) Training set: HapMap 3.3, Omni 2.5M chip, 1000 Genomes Phase I; III) Truth set: HapMap 3.3 ,Omni 2.5M chip; IV) Known set:  
395 dbSNP build 138. For INDELS we selected: I) Annotations: DP,FS,ReadPosRankSum,MQRankSum; II) Training set: Mills-Devine, 1000 Genomes Phase I, DbSnp v138; III) Truth set: Mills-Devine; IV) Known set: Mills-Devine, dbSNP build 138. For each population the lowest VQSLOD threshold has been chosen according to the output produced by VariantRecalibrator to select the best cut off in  
400 terms of specificity and sensitivity of the trained model. For SNPs the minimum VQSLOD values selected are 3.016 (97.3% truth sensitivity threshold), 2.8309 (97.82% truth sensitivity threshold), 1.4512 (98.5% truth sensitivity threshold) for



FVG, VBI and CARL cohort respectively. Since INDELS calling and alignment is still more prone to error we used a conservative approach, selecting a sensitivity  
405 threshold of 90% for each population. The filter has been applied using GATK's Apply Recalibration module.

Because of low coverage we performed several genotype refinement steps on the filtered data: 1) we used BEAGLEv4.r1230<sup>38</sup> to assign posterior probabilities to all remaining genotypes. 2) SHAPEITv2<sup>39</sup> has been used to phase all genotypes call and  
410 3) IMPUTEv2<sup>38</sup> to perform internal imputation in order to correct genotyping errors. Information about Ancestral Allele and allele frequencies from TGP populations have been retrieved from dbSNP v.138<sup>40</sup>. The Variant Effect Predictor v.74<sup>41</sup> provided all consequence annotation as well as Polyphen, Sift and GERP informations.

We merged genotype call set of the INGI populations with low coverage data  
415 available from Phase1 of the 1000 Genomes Project<sup>27</sup> in a union using set using bcftools merge<sup>36</sup>. To check if this approach would introduce bias in downstream analyses, we evaluated genotype concordance on chromosome 22 between the union set and a genotype call set in which variants were called simultaneously in all INGI, CEU and TSI populations using the same pipeline described above.

## 420 **Population genetic structure**

Shared ancestry between populations was evaluated using ADMIXTURE v 1.22 and the number of cluster that better represent the data was established by cross-validation as described in<sup>42</sup>. Each ADMIXTURE run was replicated 5 time using different random seeds. Principal Component Analysis (PCA) analysis was performed  
425 using EIGENSOFT<sup>43</sup>.

## **Kinship, identical by descent state and runs of homozygosity calculations**

Pairwise genomic kinship was calculated using KING<sup>44</sup> (options: --kinship --ibs ), while pedigree-based kinship was calculated using the R package Kinship2<sup>45</sup>. Pedigree-based kinship represent mostly an expected value indicative of the amount  
430 of genome shared identical by descent, however recombinations and mutation introduce variability around the expected values. Genomic-based kinship catches this variability providing estimates in a range rather than pedigree-based point estimates (e.g first-degree kinship vary between 0.25+/-variability). A negative genomic kinship coefficient indicates an unrelated relationship and for practical  
435 purpose it is safe to rescale negative kinship values to zero<sup>44</sup>. All analyses except kinship distributions were performed on individuals related at most to 2nd degree according to pedigree-based kinship.

Segments of identity by descent (IBD) and runs of homozygosity (ROH) were identified using the refined IBD algorithm implemented in Beagle v4.r1274<sup>46</sup>  
440 (parameters used: ibd=true, window=24000, overlap=7000). All variants with uncalled genotypes were removed, leaving 7,502,857 sites for further analyses. After discovery we retained IDB and ROH segments with LOD score >5 as threshold to define a true IBD/ROH segment (default value LOD >= 3). When comparing IBD

sharing, ROH data and allele frequencies populations were randomly down-sampled  
445 to match the size of the smallest village size (FVG-I, 46 unrelated samples) in order  
to reduce bias from different samples size.

## RX/Y

The metric  $R_{X/Y}$  was calculated implementing the formula described in <sup>32,8</sup> and <sup>20</sup>  
using the information on derived alleles counts per individual in 46 samples per  
450 population. Variance of  $R_{X/Y}$  was obtained by block jackknife procedure as described  
in <sup>47</sup>. To avoid biases due to lack of calling and imputation we considered only sites  
called as variable in both X and Y populations (shared sites). Information on the  
ancestral state of the allele were taken from 1000 Genomes annotations  
([http://ftp.1000genomes.ebi.ac.uk/vol1/ftp/phase1/analysis\\_results/supporting/ancestral\\_alignments/](http://ftp.1000genomes.ebi.ac.uk/vol1/ftp/phase1/analysis_results/supporting/ancestral_alignments/)). We used four sets of variants with information on functional  
455 consequences from Ensembl database v. 78 ([www.ensembl.org](http://www.ensembl.org)): (i) 136,805 variants  
annotated as intergenic, i.e. “in region containing or overlapping no genes that is  
bounded on either side by a gene, or bounded by a gene and the end of the  
chromosome” according to Sequence Ontology definition (S.O.,  
460 <http://www.sequenceontology.org/>); (ii) 25,773 missense variants, i.e. “A sequence  
variant, that changes one or more bases, resulting in a different amino acid  
sequence but where the length is preserved” (S.O.); (iii) 23,242 synonymous, i.e. “A  
sequence variant where there is no resulting change to the encoded amino acid”  
(S.O.), and (iv) 2,804 loss of function variants described in<sup>30</sup>

## 465 Simulations

We used SLiM<sup>48</sup> to perform forward-in-time simulation of purging of deleterious  
recessive alleles in a small size human isolated population. SLiM and allow

simulations of specific genomic structures with different selective pressures acting on them. We simulated a genomic region of 115 kbp containing fifty gene-like  
470 structures representative of the average human gene<sup>49</sup> each composed of 8 exons of 150 bp surrounded by 2 UTR regions of 550 bp. Recombination rate was set to 1.6e-8 recombinations/bp/generation, mutation rate to 1.2e-8 mutations/bp/generation. Generation time was set to 25 years. Mutations were assumed to be deleterious  $\frac{3}{4}$  of the time in exons and  $\frac{1}{2}$  in UTRs. Six deleterious selection coefficients were tested  
475 independently ( $s = -0.2, -0.1, -0.05, -0.01, -0.005$  and  $-0.001$ ) being the strongest one the upper limit estimated for human species. Deleterious mutations were assumed to be fully recessive additive or dominant.

As for the demographic model we simulated an isolated population of European ancestry undergoing a founder event of different intensity in terms of number of  
480 individuals and length of the bottleneck (see simulation scheme in Figure S7) and then evolving under an specific demography. Three different split times of the isolate from Europe (160, 60 and 20 generations ago), and five demographies were tested: continued bottleneck, serial founder effect, bottleneck plus linear expansion, bottleneck plus instantaneous expansion and bottleneck plus linear reduction). To  
485 mimic isolation we assumed no migration between the isolate and the European population after the split. The European population was simulated under the model described in<sup>50</sup> with a minor modifications: because SLiM does not simulate exponential growth we extrapolated the trajectory of the exponential growth found in Out-of-Africa populations from<sup>50</sup> and increased population effective size every few  
490 generations. Finally, in our model the European population itself separate from Africa as described in<sup>50</sup>. To mimic relatedness we let inbreeding starts one generation after the split between Europe and the isolate using two inbreeding coefficients: one similar to estimates from empirical data (averages among all isolates,  $f = 0.002$ ,

Table S7 ) and a second one five times bigger ( $f = 0.01$ ). To use these inbreeding  
495 coefficient in the forward simulator (SLiM), we converted them into selfing coefficient  
using this formula described in  
(<http://darwin.eeb.uconn.edu/eeb348/lecturenotes/inbreeding.pdf>).

Each set of parameters and demographies was simulated 500 times and,  
additionally, we considered groups of 10 replicates together as they were  
500 independent chromosomes in order to reduce the variance in the individual  
recessive load calculation. From every simulated replica we sampled 50 individuals  
in each of the three populations. In simulations with a final population effective size  
of less than 50 individuals the whole population was sampled. To speed up  
computation we used two strategies. First, we removed from simulations the  
505 neutrally evolving intergenic and intronic regions, thus mimicking exomic data.  
Secondly, to avoid repeating the burn-in process, we simulated 500 replicates for  
Africans and Europeans and saved all the individual genotypes at 200 generations  
after the beginning of the simulation (5000 years ago) and we used these population  
snapshots as genetic pools for the founding nucleus of the isolate while testing  
510 different demographic models. We believe that this strategy ensures enough  
variation for testing properly the different population sizes for the ISO population  
without having to use a new simulations run from the scratch.

### **Effective population size**

Recent effective population size for each population was estimated using the  
515 fraction of genome shared IBD by pairs of individuals<sup>33</sup>. After computational phasing,  
IBD sharing was computed as described in<sup>51</sup>. We initially removed all variants with  
minor allele frequency less than 1%. We used a publicly available genetic map (b37,  
Web Resources), using linear interpolation to infer the genetic position of variants

that were not found in the map. We then used the GERMLINE<sup>52</sup> software to infer IBD sharing across all pairs of samples, using parameters “-min\_m 1 -err\_hom 2 -err\_het 0 -bits 75 -h\_extend -homoz”. We computed the density of IBD sharing per genomic region using windows of 0.5 centimorgans (cM), and selected for downstream analysis regions within 5 standard deviations from the genome-wide average, removing regions of unusual sharing, likely due to artifacts or the presence of underlying structural variation. We further imposed a minimum length of 45cM per genomic region to avoid introducing biases due to boundary effects in very short regions. We obtained 27 regions, for a total of ~2050 cM. We computed the fraction of genome shared by the average pair of haploid individuals in each analysed group through segments of length at least 6 cM. We then used the formula:  $N = (1 - f + \sqrt{(1 - f)}) / 2uf$  derived in<sup>33</sup>, where  $f$  is the observed fraction of genome shared IBD and  $u$  is the minimum segment length (in Morgans) to infer effective population size (assuming a constant size). We report diploid effective sizes. Standard errors were computed using the weighted jackknife method<sup>52</sup>, using the 27 genomic regions. To infer an approximate correspondence between IBD segment cut-off and time, we considered the distribution of IBD segments age in a constant population size. Assuming a generation time of 30 years<sup>53</sup> a cutoff of 6 cM roughly corresponds to IBD segments transmitted by common ancestors living  $30 * (100/6) = 500$  years before present.

## 540 **References**

1. Kimura, M. *Population Genetics, Molecular Evolution, and the Neutral Theory*. (University of Chicago Press, 1995). at <http://www.press.uchicago.edu/ucp/books/book/chicago/P/bo3645416.html>

2. Robertson, A. The Effect of Inbreeding on the Variation Due to Recessive Genes. *Genetics* **37**, 189–207 (1952).
3. Wang, J., Caballero, A., Keightley, P. D. & Hill, W. G. Bottleneck effect on genetic variance. A theoretical investigation of the role of dominance. *Genetics* **150**, 435–447 (1998).
4. Wang, J., Hill, W. G., Charlesworth, D. & Charlesworth, B. Dynamics of inbreeding depression due to deleterious mutations in small populations: mutation parameters and inbreeding rate. *Genet. Res.* **74**, 165–178 (1999).
5. Whitlock, M. C. Selection, load and inbreeding depression in a large metapopulation. *Genetics* **160**, 1191–1202 (2002).
6. García-Dorado, A. A simple method to account for natural selection when predicting inbreeding depression. *Genetics* **180**, 1559–1566 (2008).
7. Casals, F. et al. Whole-Exome Sequencing Reveals a Rapid Change in the Frequency of Rare Functional Variants in a Founding Population of Humans. *PLoS Genet* **9**, e1003815 (2013).
8. Do, R. et al. No evidence that selection has been less effective at removing deleterious mutations in Europeans than in Africans. *Nat. Genet.* **47**, 126–131 (2015).
9. Lohmueller, K. E. et al. Proportionally more deleterious genetic variation in European than in African populations. *Nature* **451**, 994–997 (2008).

10. Simons, Y. B., Turchin, M. C., Pritchard, J. K. & Sella, G. The deleterious mutation load is insensitive to recent population history. *Nat. Genet.* **46**, 220–224 (2014).
11. Gravel, S. When is selection effective? *bioRxiv* 010934 (2014).  
doi:10.1101/010934
12. Lohmueller, K. E. The distribution of deleterious genetic variation in human populations. *Curr. Opin. Genet. Dev.* **29**, 139–146 (2014).
13. Bittles, A. H. & Neel, J. V. The costs of human inbreeding and their implications for variations at the DNA level. *Nat. Genet.* **8**, 117–121 (1994).
14. Jorde, L. B. Consanguinity and prereproductive mortality in the Utah Mormon population. *Hum. Hered.* **52**, 61–65 (2001).
15. Ober, C., Hyslop, T. & Hauck, W. W. Inbreeding effects on fertility in humans: evidence for reproductive compensation. *Am. J. Hum. Genet.* **64**, 225–231 (1999).
16. Postma, E., Martini, L. & Martini, P. Inbred women in a small and isolated Swiss village have fewer children. *J. Evol. Biol.* **23**, 1468–1474 (2010).
17. Rudan, I. et al. Inbreeding and risk of late onset complex disease. *J. Med. Genet.* **40**, 925–932 (2003).
18. Kirkpatrick, null & Jarne, null. The Effects of a Bottleneck on Inbreeding Depression and the Genetic Load. *Am. Nat.* **155**, 154–167 (2000).
19. Facon, B. et al. Inbreeding depression is purged in the invasive insect *Harmonia axyridis*. *Curr. Biol. CB* **21**, 424–427 (2011).



20. Xue, Y. et al. Mountain gorilla genomes reveal the impact of long-term population decline and inbreeding. *Science* **348**, 242–245 (2015).
21. Bittles, A. H., Mason, W. M., Greene, J. & Rao, N. A. Reproductive behavior and health in consanguineous marriages. *Science* **252**, 789–794 (1991).
22. Helgason, A., Pálsson, S., Gudbjartsson, D. F., Kristjánsson, T. & Stefánsson, K. An association between the kinship and fertility of human couples. *Science* **319**, 813–816 (2008).
23. Colonna, V. et al. Small effective population size and genetic homogeneity in the Val Borbera isolate. *Eur. J. Hum. Genet.* **21**, 89–94 (2013).
24. Esko, T. et al. Genetic characterization of northeastern Italian population isolates in the context of broader European genetic diversity. *Eur. J. Hum. Genet.* **21**, 659–665 (2013).
25. Traglia, M. et al. Heritability and Demographic Analyses in the Large Isolated Population of Val Borbera Suggest Advantages in Mapping Complex Traits Genes. *PLoS ONE* **4**, e7554 (2009).
26. Consortium, T. 1000 G. P. A map of human genome variation from population-scale sequencing. *Nature* **467**, 1061–1073 (2010).
27. 1000 Genomes Project Consortium et al. An integrated map of genetic variation from 1,092 human genomes. *Nature* **491**, 56–65 (2012).
28. Keinan, A. & Clark, A. G. Recent Explosive Human Population Growth Has Resulted in an Excess of Rare Genetic Variants. *Science* **336**, 740–743 (2012).

29. Pemberton, T. J. et al. Genomic patterns of homozygosity in worldwide human populations. *Am. J. Hum. Genet.* **91**, 275–292 (2012).
30. MacArthur, D. G. et al. A systematic survey of loss-of-function variants in human protein-coding genes. *Science* **335**, 823–828 (2012).
31. Lawrie, D. S., Messer, P. W., Hershberg, R. & Petrov, D. A. Strong purifying selection at synonymous sites in *D. melanogaster*. *PLoS Genet.* **9**, e1003527 (2013).
32. Balick, D. J., Do, R., Reich, D. & Sunyaev, S. R. Response to a population bottleneck can be used to infer recessive selection. *bioRxiv* 003491 (2014). doi:10.1101/003491
33. Palamara, P. F., Lencz, T., Darvasi, A. & Pe'er, I. Length Distributions of Identity by Descent Reveal Fine-Scale Demographic History. *Am. J. Hum. Genet.* **91**, 809–822 (2012).
34. Coventry, A. et al. Deep resequencing reveals excess rare recent variants consistent with explosive population growth. *Nat. Commun.* **1**, 131 (2010).
35. Glémin, S. How are deleterious mutations purged? Drift versus nonrandom mating. *Evol. Int. J. Org. Evol.* **57**, 2678–2687 (2003).
36. Li, H. et al. The Sequence Alignment/Map format and SAMtools. *Bioinforma. Oxf. Engl.* **25**, 2078–2079 (2009).
37. DePristo, M. A. et al. A framework for variation discovery and genotyping using next-generation DNA sequencing data. *Nat. Genet.* **43**, 491–498 (2011).

38. Browning, S. R. & Browning, B. L. Rapid and Accurate Haplotype Phasing and Missing-Data Inference for Whole-Genome Association Studies By Use of Localized Haplotype Clustering. *Am. J. Hum. Genet.* **81**, 1084–1097 (2007).
39. Delaneau, O., Howie, B., Cox, A. J., Zagury, J.-F. & Marchini, J. Haplotype Estimation Using Sequencing Reads. *Am. J. Hum. Genet.* **93**, 687–696 (2013).
40. Sherry, S. T. et al. dbSNP: the NCBI database of genetic variation. *Nucleic Acids Res.* **29**, 308–311 (2001).
41. McLaren, W. et al. Deriving the consequences of genomic variants with the Ensembl API and SNP Effect Predictor. *Bioinforma. Oxf. Engl.* **26**, 2069–2070 (2010).
42. Alexander, D. H., Novembre, J. & Lange, K. Fast model-based estimation of ancestry in unrelated individuals. *Genome Res.* **19**, 1655–1664 (2009).
43. Patterson, N., Price, A. L. & Reich, D. Population structure and eigenanalysis. *PLoS Genet.* **2**, e190 (2006).
44. Manichaikul, A. et al. Robust relationship inference in genome-wide association studies. *Bioinformatics* **26**, 2867–2873 (2010).
45. Sinnwell, J. P., Therneau, T. M. & Schaid, D. J. The kinship2 R package for pedigree data. *Hum. Hered.* **78**, 91–93 (2014).
46. Browning, B. L. & Browning, S. R. Improving the Accuracy and Efficiency of Identity-by-Descent Detection in Population Data. *Genetics* **194**, 459–471 (2013).

Cocca et al. - Purging of deleterious variants in founder populations

47. Busing, F. M. T. A., Meijer, E. & Leeden, R. V. D. Delete-m Jackknife for Unequal m. *Stat. Comput.* **9**, 3-8 (1999).
48. Messer, P. W. SLiM: simulating evolution with selection and linkage. *Genetics* **194**, 1037-1039 (2013).
49. Sakharkar, M. K., Chow, V. T. K. & Kanguane, P. Distributions of exons and introns in the human genome. *In Silico Biol.* **4**, 387-393 (2004).
50. Gravel, S. et al. Demographic history and rare allele sharing among human populations. *Proc. Natl. Acad. Sci. U. S. A.* **108**, 11983-11988 (2011).
51. The Genome of the Netherlands Consortium. Whole-genome sequence variation, population structure and demographic history of the Dutch population. *Nat. Genet.* **46**, 818-825 (2014).
52. Gusev, A. et al. Whole population, genome-wide mapping of hidden relatedness. *Genome Res.* **19**, 318-326 (2009).
53. Fenner, J. N. Cross-cultural estimation of the human generation interval for use in genetics-based population divergence studies. *Am. J. Phys. Anthropol.* **128**, 415-423 (2005).

## Acknowledgements

We acknowledge the contribution of people from villages. This study was supported by the European Commission (FP7/2007-2013, under grant agreement number no. 545 262055 (ESGI), as a Transnational Access project of the European Sequencing and Genotyping Infrastructure"; Italian Ministero della Salute - Ricerca Finalizzata PE-

*Cocca et al. - Purging of deleterious variants in founder populations*

2011-02347500 to PG and DT; Italian Ministero della Salute - Public Health Genomics  
2010 and Fondazione Cariplo to DT; the Wellcome Trust (Grant Codes WT098051 and  
WT091310), the NIHR and the EU FP7 (EPIGENESYS Grant Code 257082 and  
550 BLUEPRINT Grant Code HEALTH-F5-2011-282510) to NS.

## Author contributions

MC, MP, PFP, EG and VC designed and performed analyses. MT, CFS, SU  
performed genotype quality controls. YM, RD generated and analysed exome data.  
555 AKK coordinated exome sequencing/data generation. PG, DT discussed the analyses'  
results. NS and VC wrote the manuscript.

## Competing financial interests

The authors declare no competing financial interests.

## 560 Figure captions

**Figure 1 Overview of genomic variation in isolates (a)** Geographic location of the  
populations in this study. Circles are proportional to sample sizes. VBI=Val Borbera,  
CAR= Carlantino, FVG = Friuli Venezia Giulia, FVG-E = Erto, FVG-I = Illegio, FVG-R=  
Resia and FVG-S = Sauris **(b)** Genomic sites variable in isolates were classified as  
565 shared if variable in both in CEU and/or TSI and isolates and private if variable only in  
isolates. When considering 46 samples per population about 13% of variants are  
private to isolates (yellow) **(c)** Boxplots summarize the ratio of  
missense/synonymous counts per individual. Private variants have larger variance  
and are significantly enriched for missense mutations compared to shared

Cocca et al. - Purging of deleterious variants in founder populations

570 ones. **(d)** Genome wide spectrum of minor allele allele frequencies (MAF) from 46 samples per population. For simplicity only  $MAF < 23$  is shown, full spectra in Figure S1. First two bins include rare variants ( $MAF < 0.3\%$ ). Private sites are significantly enriched for rare variants compared to shared sites (Table S6).

**Figure 2 Systematic consanguinity in the isolated populations.** Violin plots represent genomic-based kinship distribution before (dark blue) and after (light blue) removing 1<sup>st</sup> degree relatives according to pedigree. Grey dotted lines represent reference values for 1<sup>st</sup>-, 2<sup>nd</sup>- and 3<sup>rd</sup>-degree relationships. People in isolates tend to be more consanguineous, i.e. they have more recent common ancestors than reference populations. In FVG-R and VBI relatedness to 1<sup>st</sup> degree persists even after removing 1<sup>st</sup> degree relatives according to pedigree data. The explanation is that 580 ancestors of some 2<sup>nd</sup> and 3<sup>rd</sup> degree relatives were in turn the results of consanguineous relationship, showing that consanguinity in these populations has occurred on a long time scale

**Figure 3 Genome sharing between individuals and within individual.** Summary statistics **(a and b)** and cumulative frequency **(c and d)** of the total length of segments identical by descent per pairs of individuals and total length of runs of homozygosity per single individuals. In both **c** and **d** the dashed line indicates the 95% percentile

**Figure 4 Depletion in the isolates of homozygous genotypes at loss of function (LoF) variants.** **(a)** Counts of derived allele per individual at variable sites with missense synonymous and LoF consequences sites. Dark and light asterisks indicate statistically significant ( $p\text{-value} < 0.001$ , Table S9) differences from TSI and CEU, respectively. Overall in isolates individuals have less derived alleles compared to reference populations. **(b)** Fraction of genotypes homozygous for the derived 590

Cocca et al. - Purging of deleterious variants in founder populations

595 allele normalized by homozygous derived genotypes at intergenic sites. At mildly deleterious sites (missense and synonymous) isolates have significantly higher rates of homozygosity compared to reference (Table S9) whereas at LoF sites rates are comparable, suggesting a depletion of homozygous deleterious genotypes in isolates.

600 **Figure 5 Effectiveness of selection** Pairwise comparison of isolates with CEU **(a)** and TSI **(b)** at missense, synonymous and LoF sites.  $R_{XY}$  is a measure of the accumulation of mutations in population X respect to population Y; values lower than 1 indicate a depletion in population X and *viceversa*. Bars represent variance obtained from block jackknives. While for mildly deleterious mutations  $R_{XY}$  follows a trend compatible with less efficient selection and stronger drift,  $R_{XY}$  at LoF shows  
605 more efficient selection in isolates compared to reference populations.

**Figure 6 Expectations to observe purging.** Purging is measured as the fold change between present and past (at founding event) average number of recessive deleterious homozygous genotypes per individual. If this number was less than one the (negative) reciprocal is listed. A negative fold change is expected in case of  
610 purging. Boxplots summarize results of 100 replicates, each replicate being the average over 50 individuals. Dominant, additive and recessive models are shown for neutral (selection coefficient,  $s=0$ ), mildly deleterious ( $s=0.01$ ) and highly deleterious ( $s=0.1$ ) variants in three populations with different average kinship.  
615  $N_e$ =effective population size.

**Figure 7 Effective population size** Skyline plot of effective population size in very recent times inferred from identical by descent genome of individuals within populations

*Cocca et al. - Purging of deleterious variants in founder populations*



**a**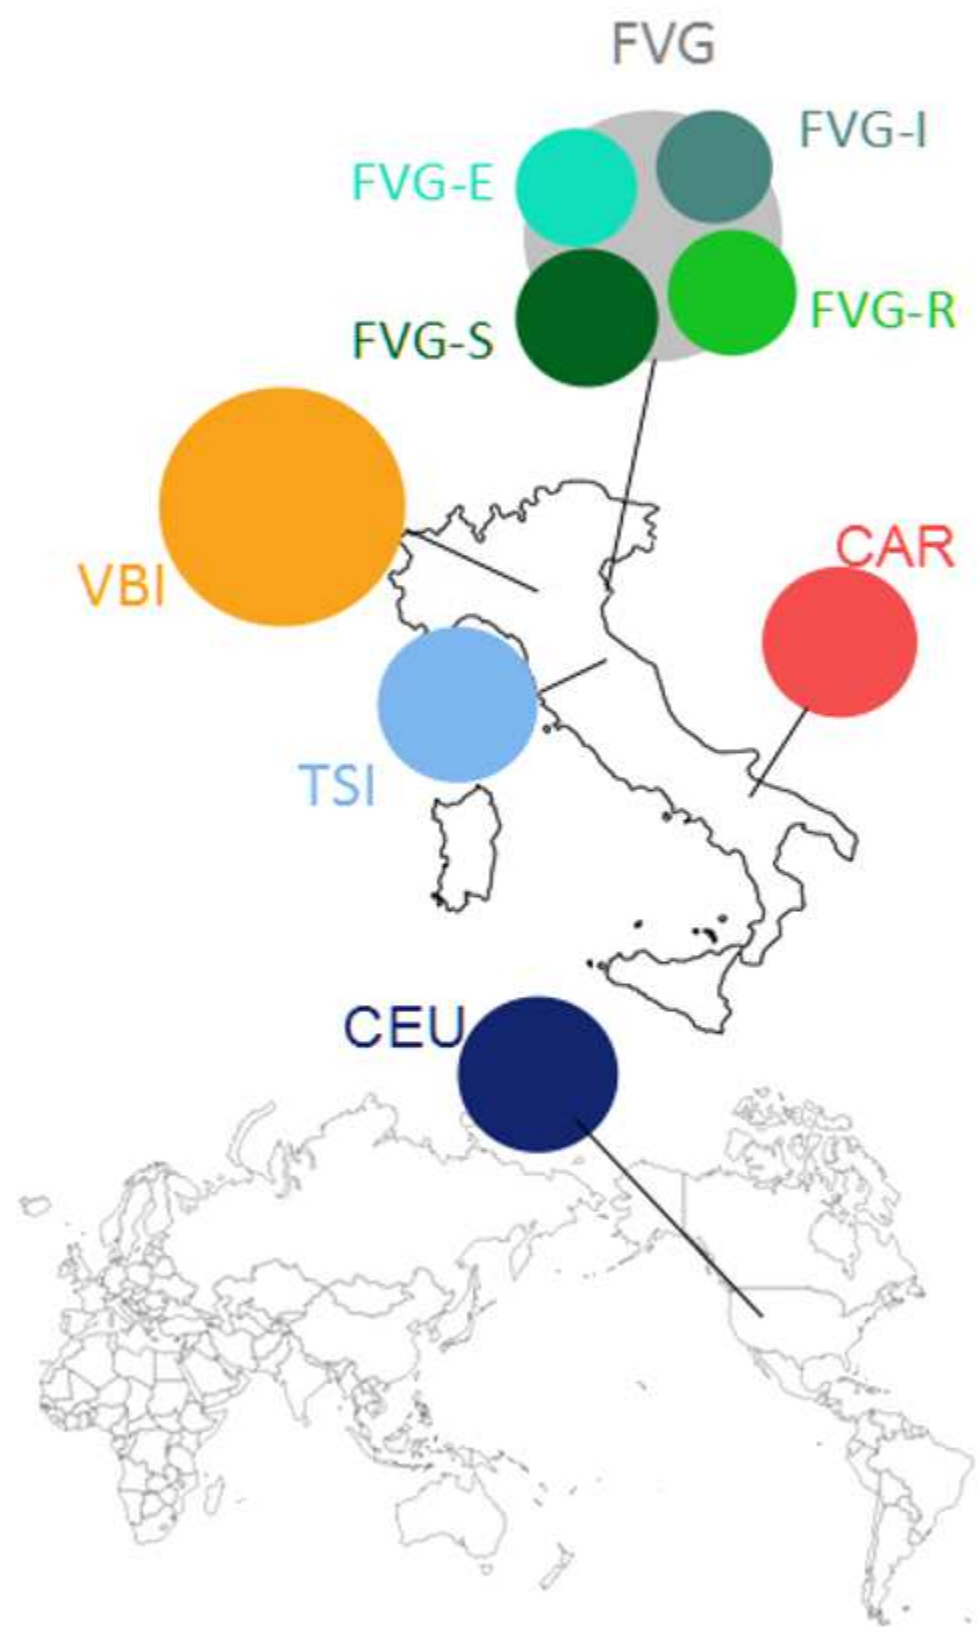**b**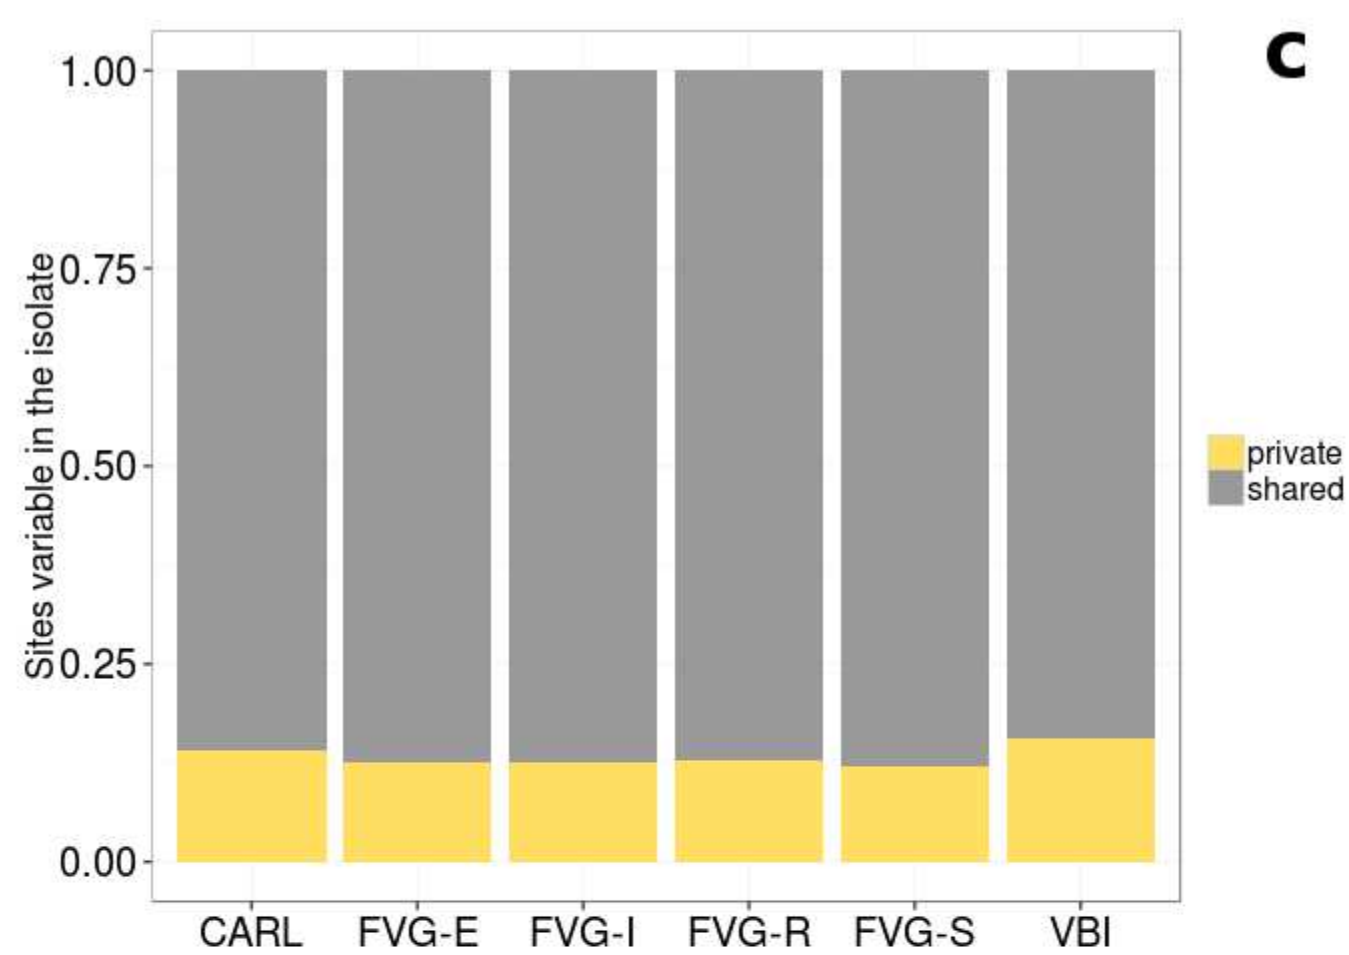**c**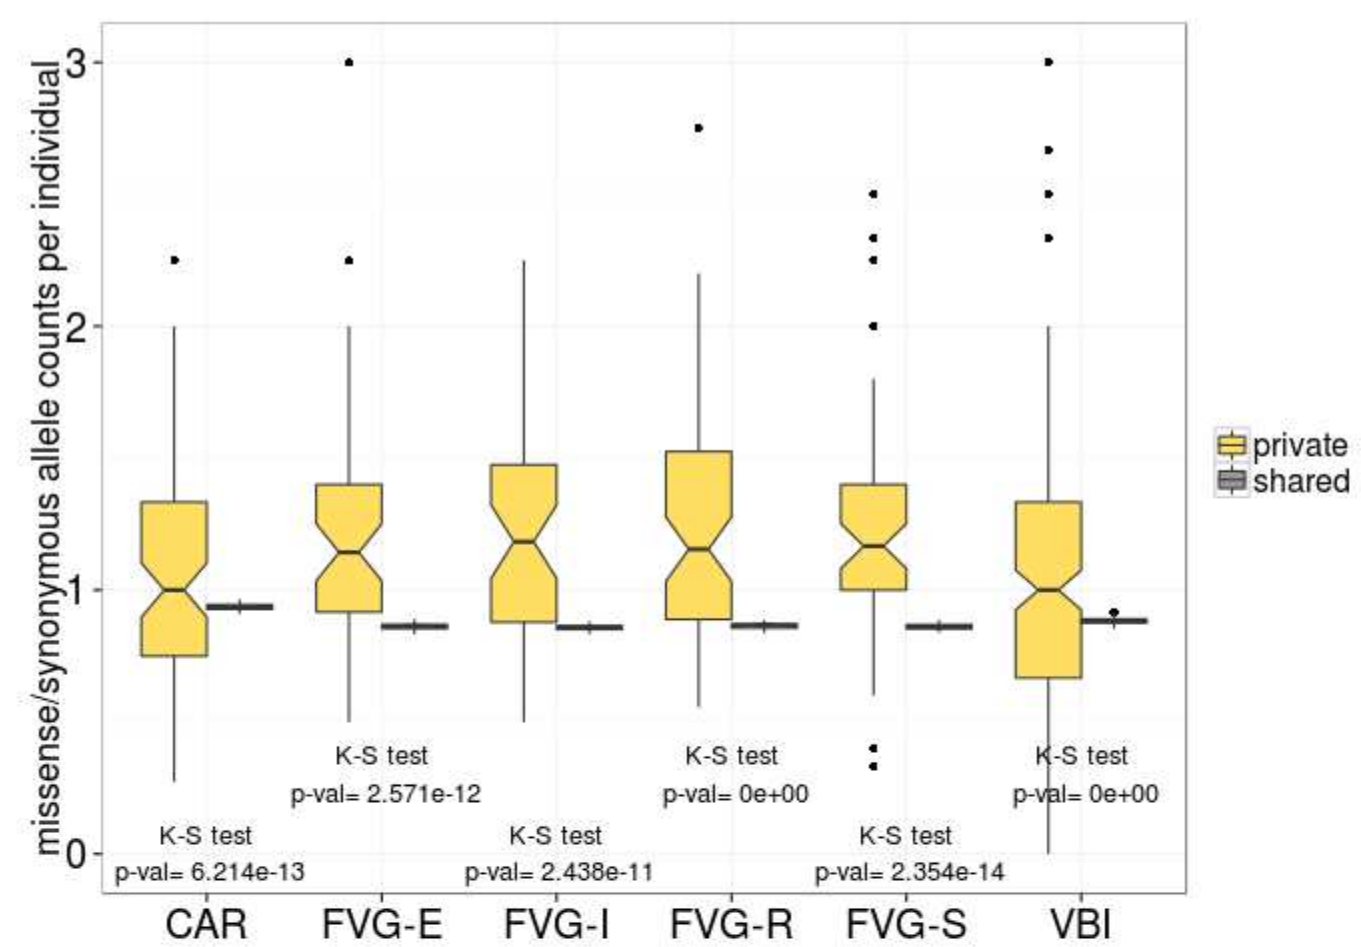**d**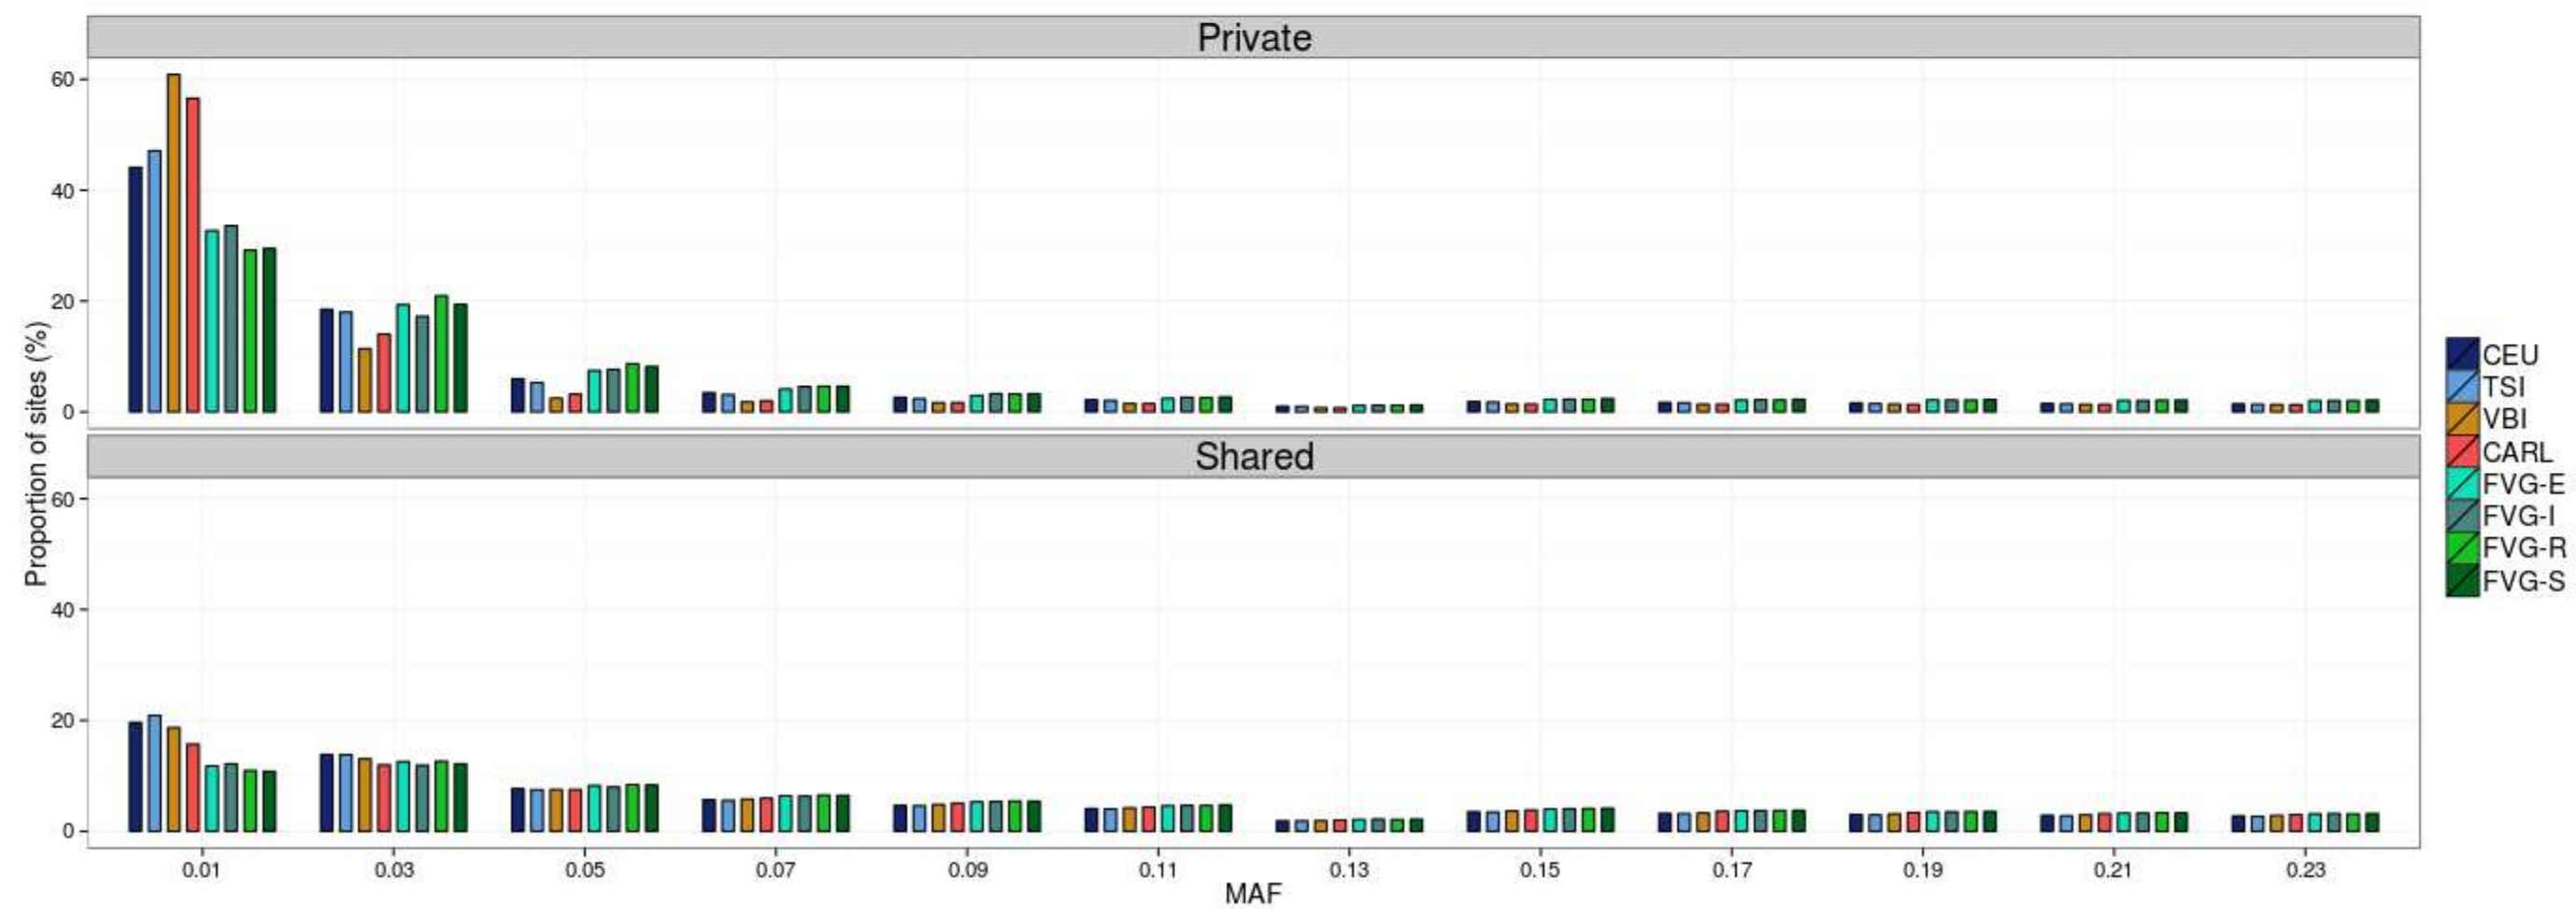

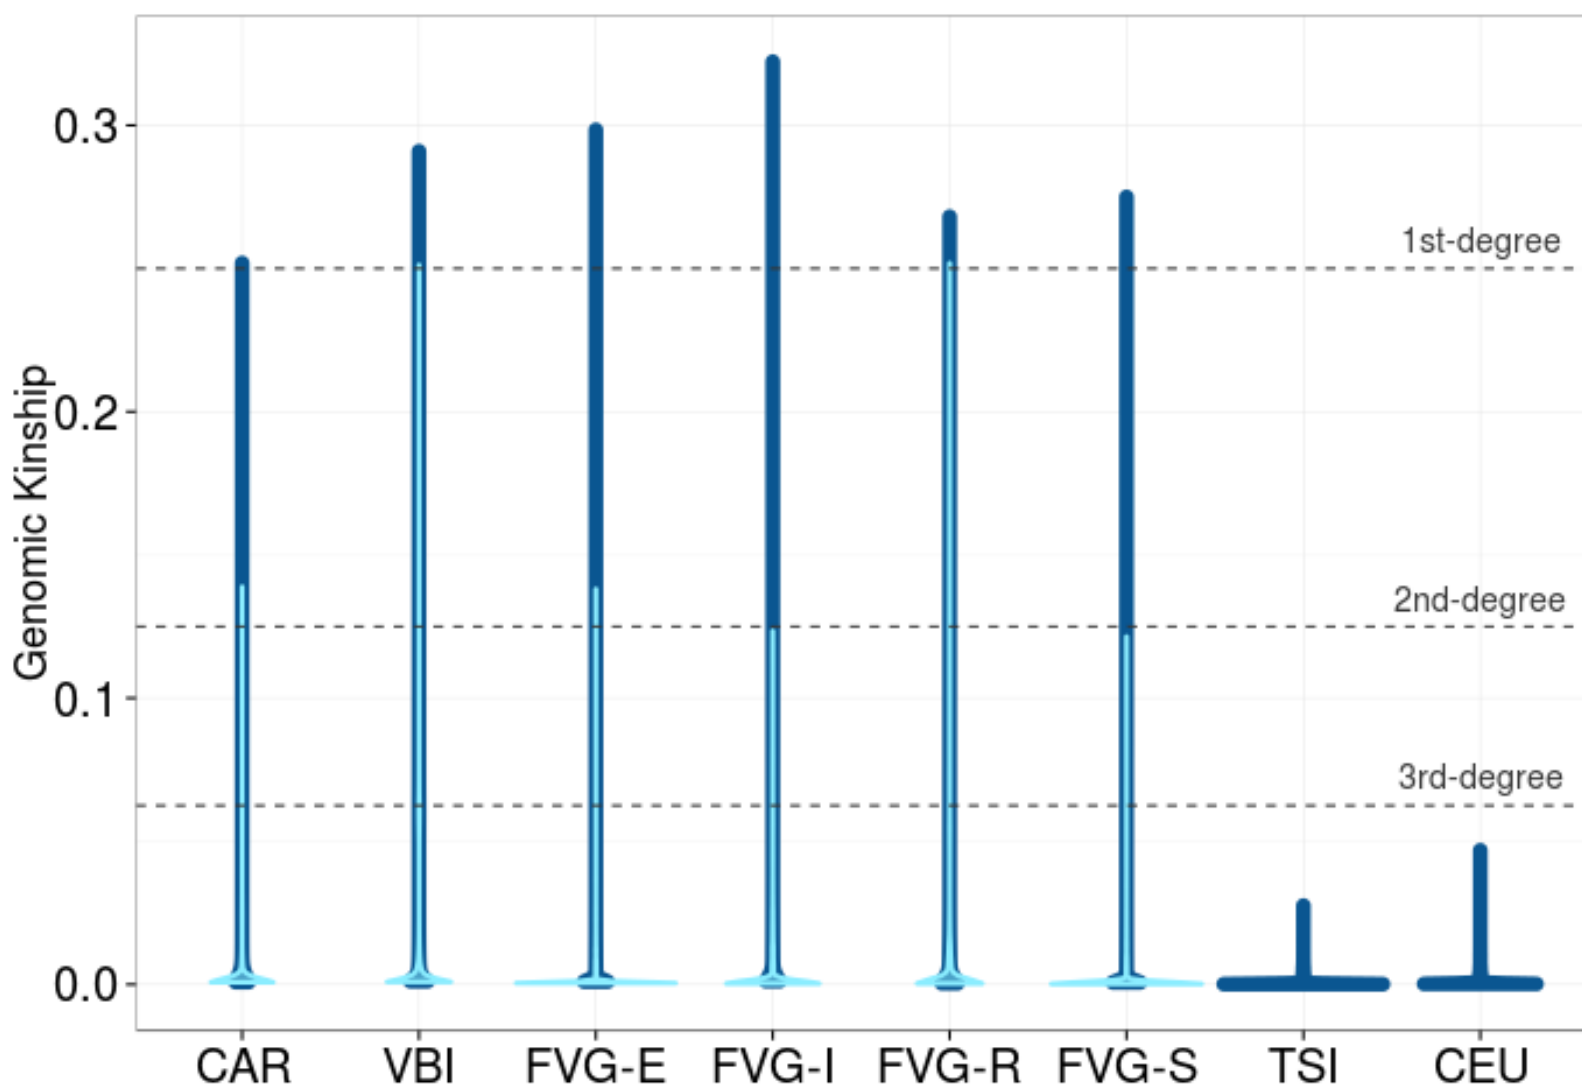

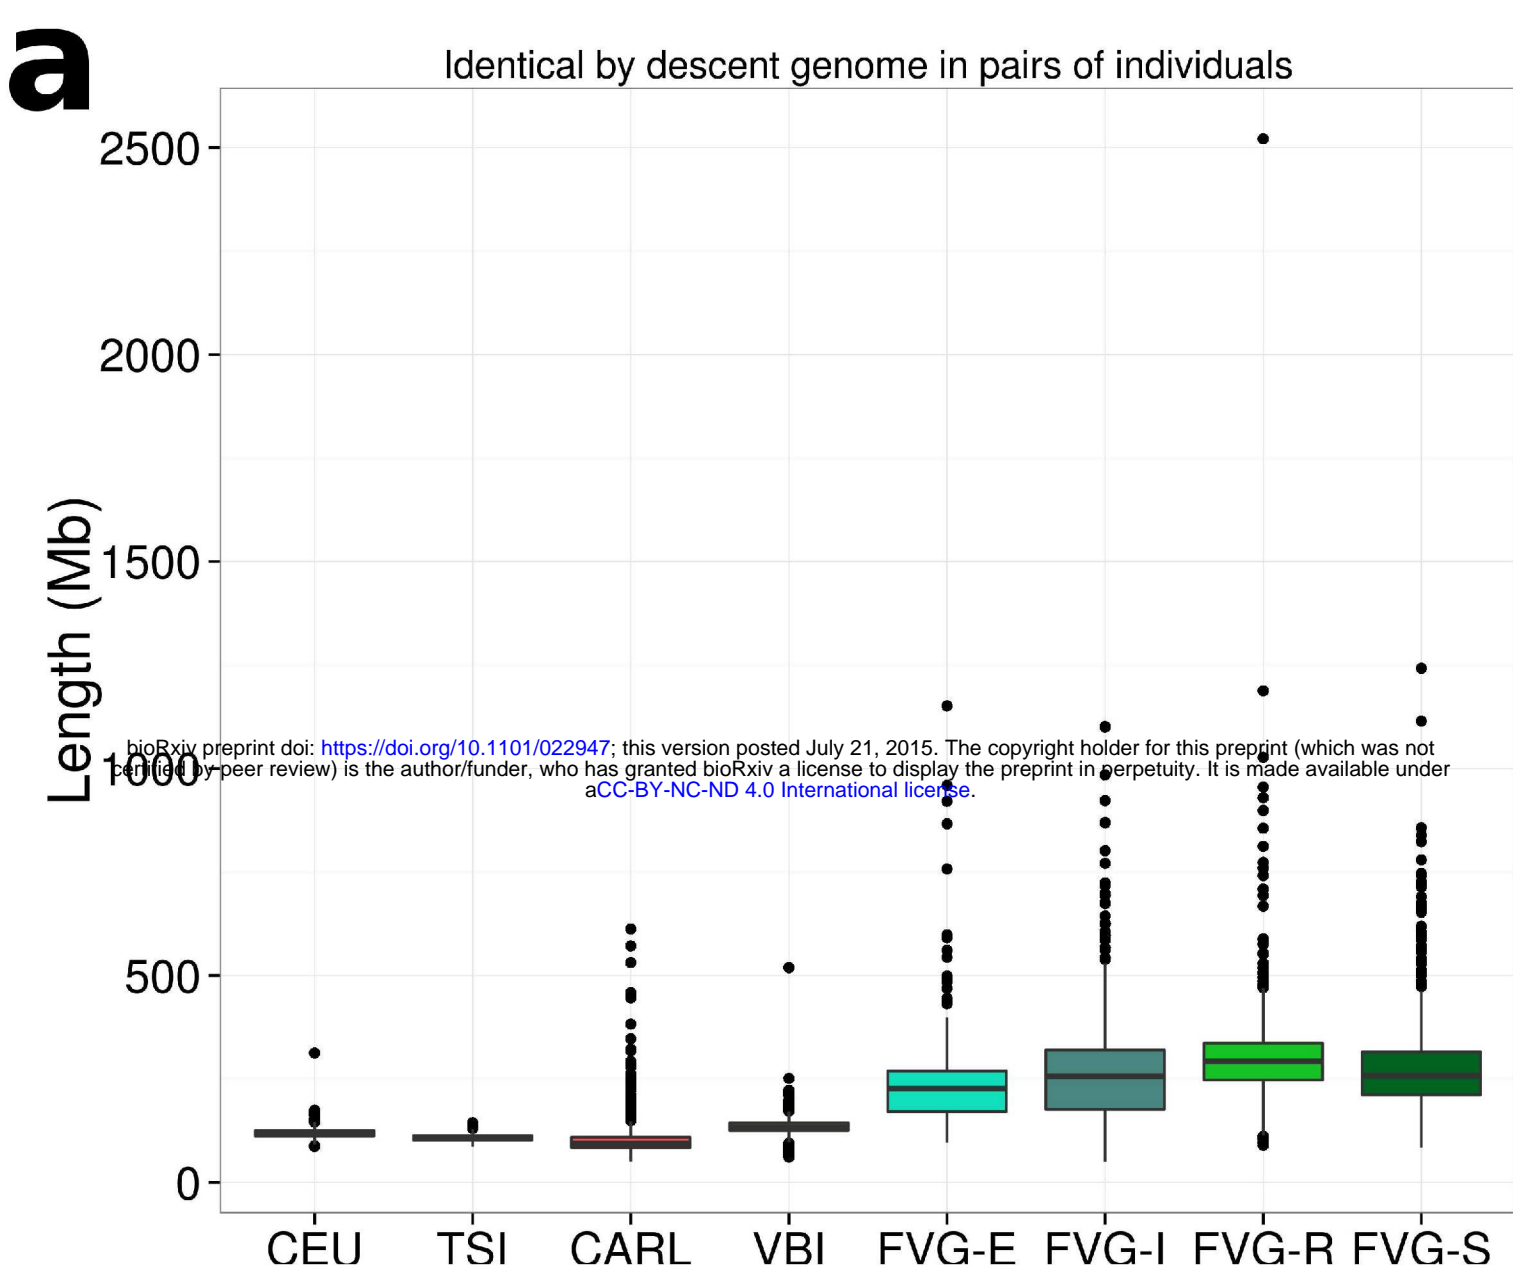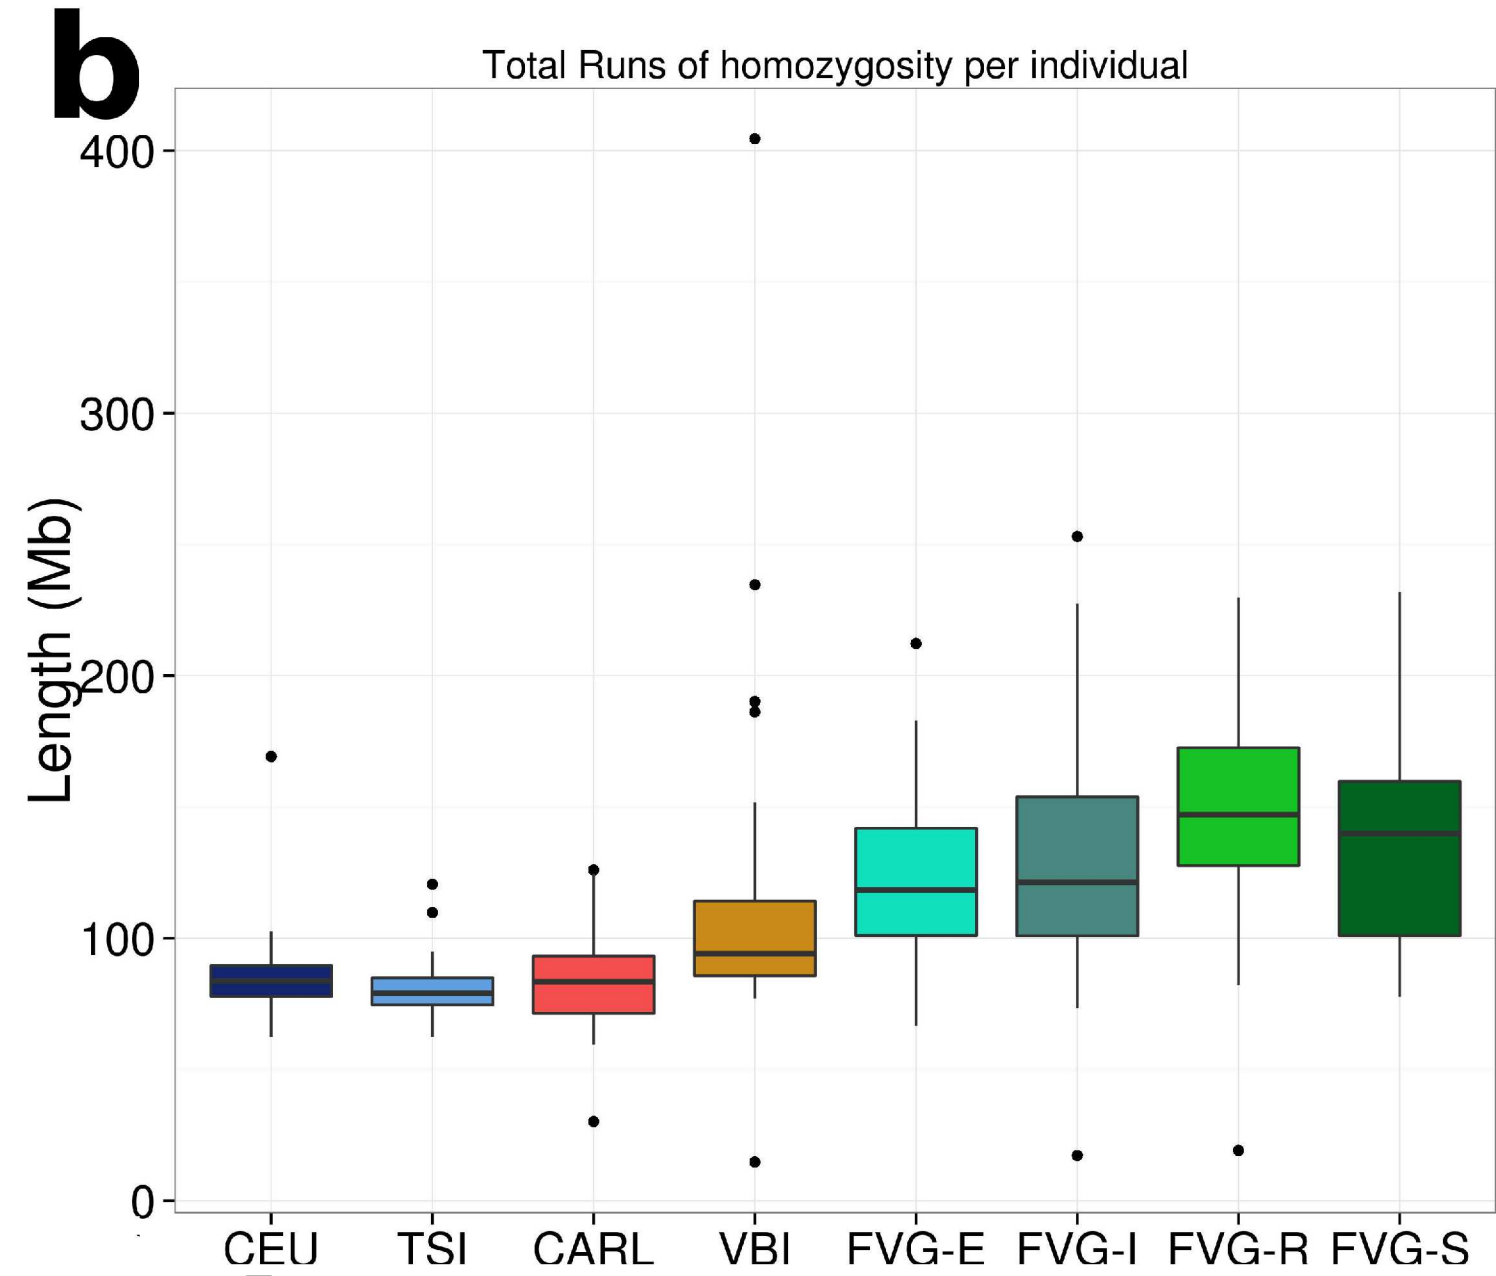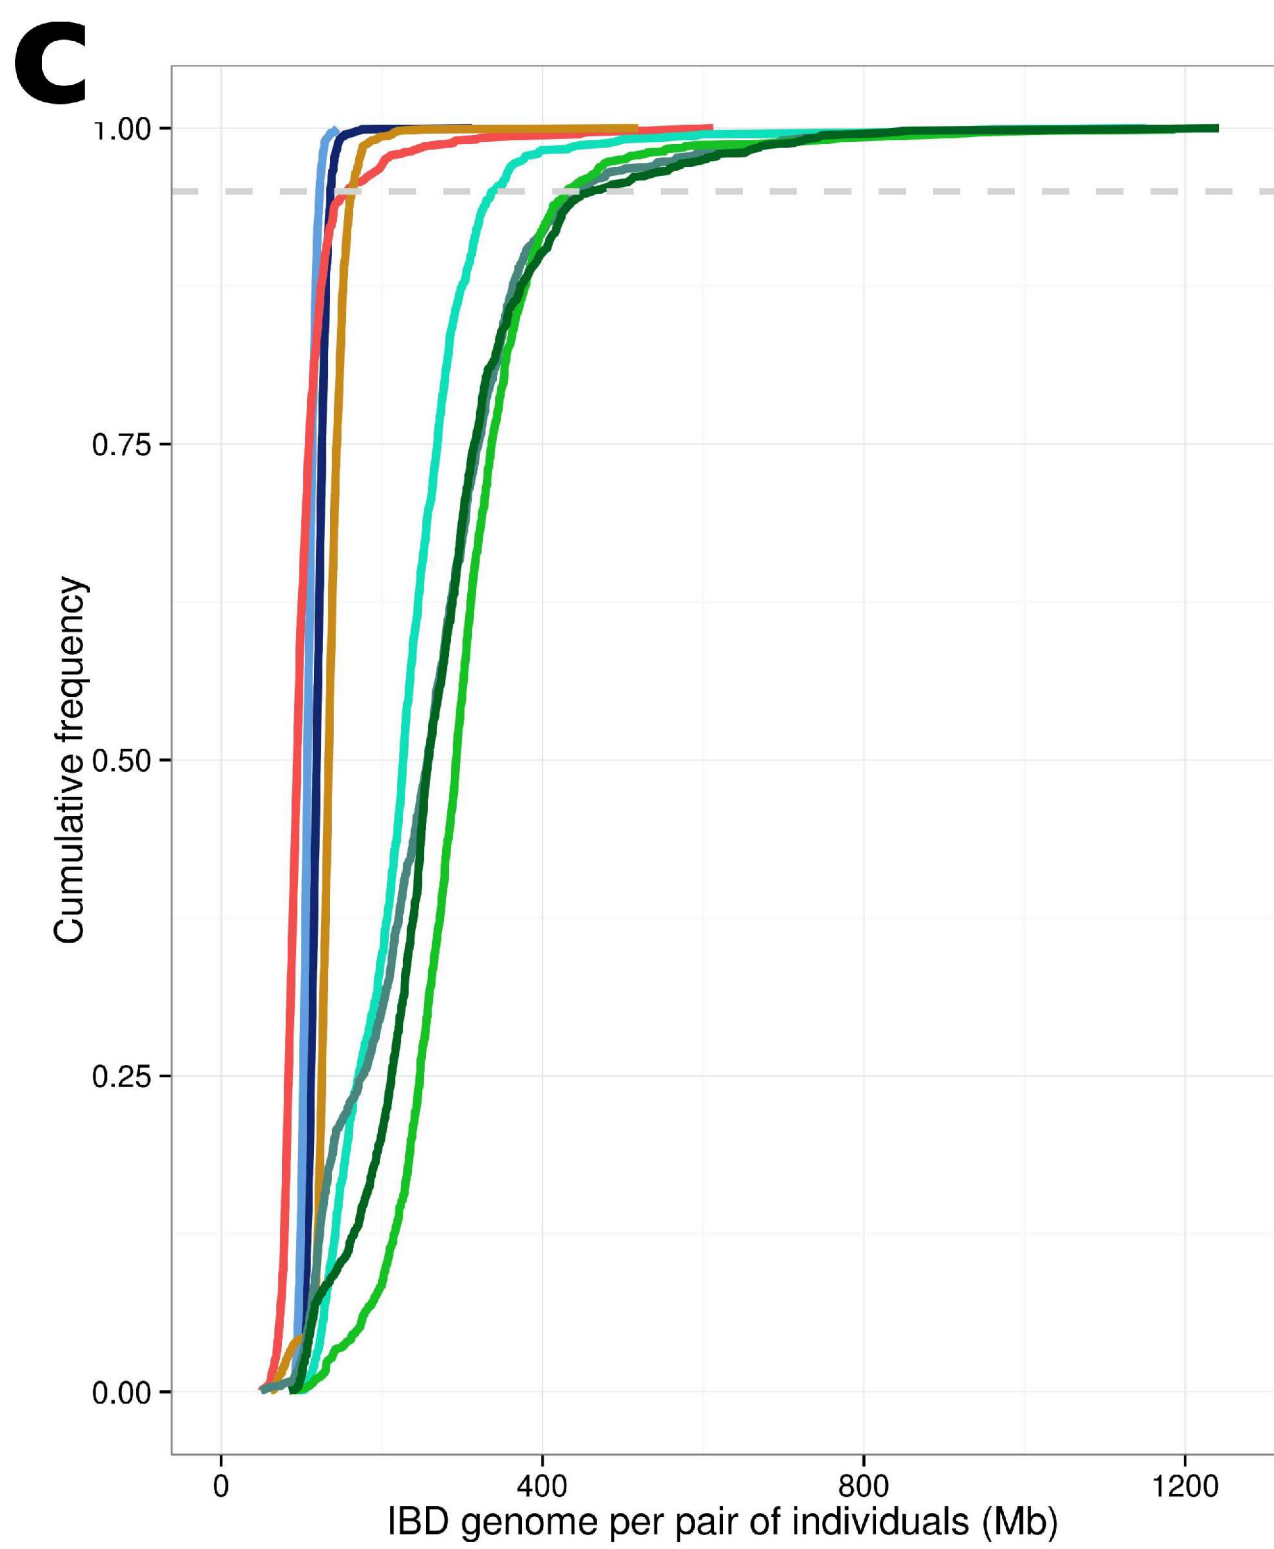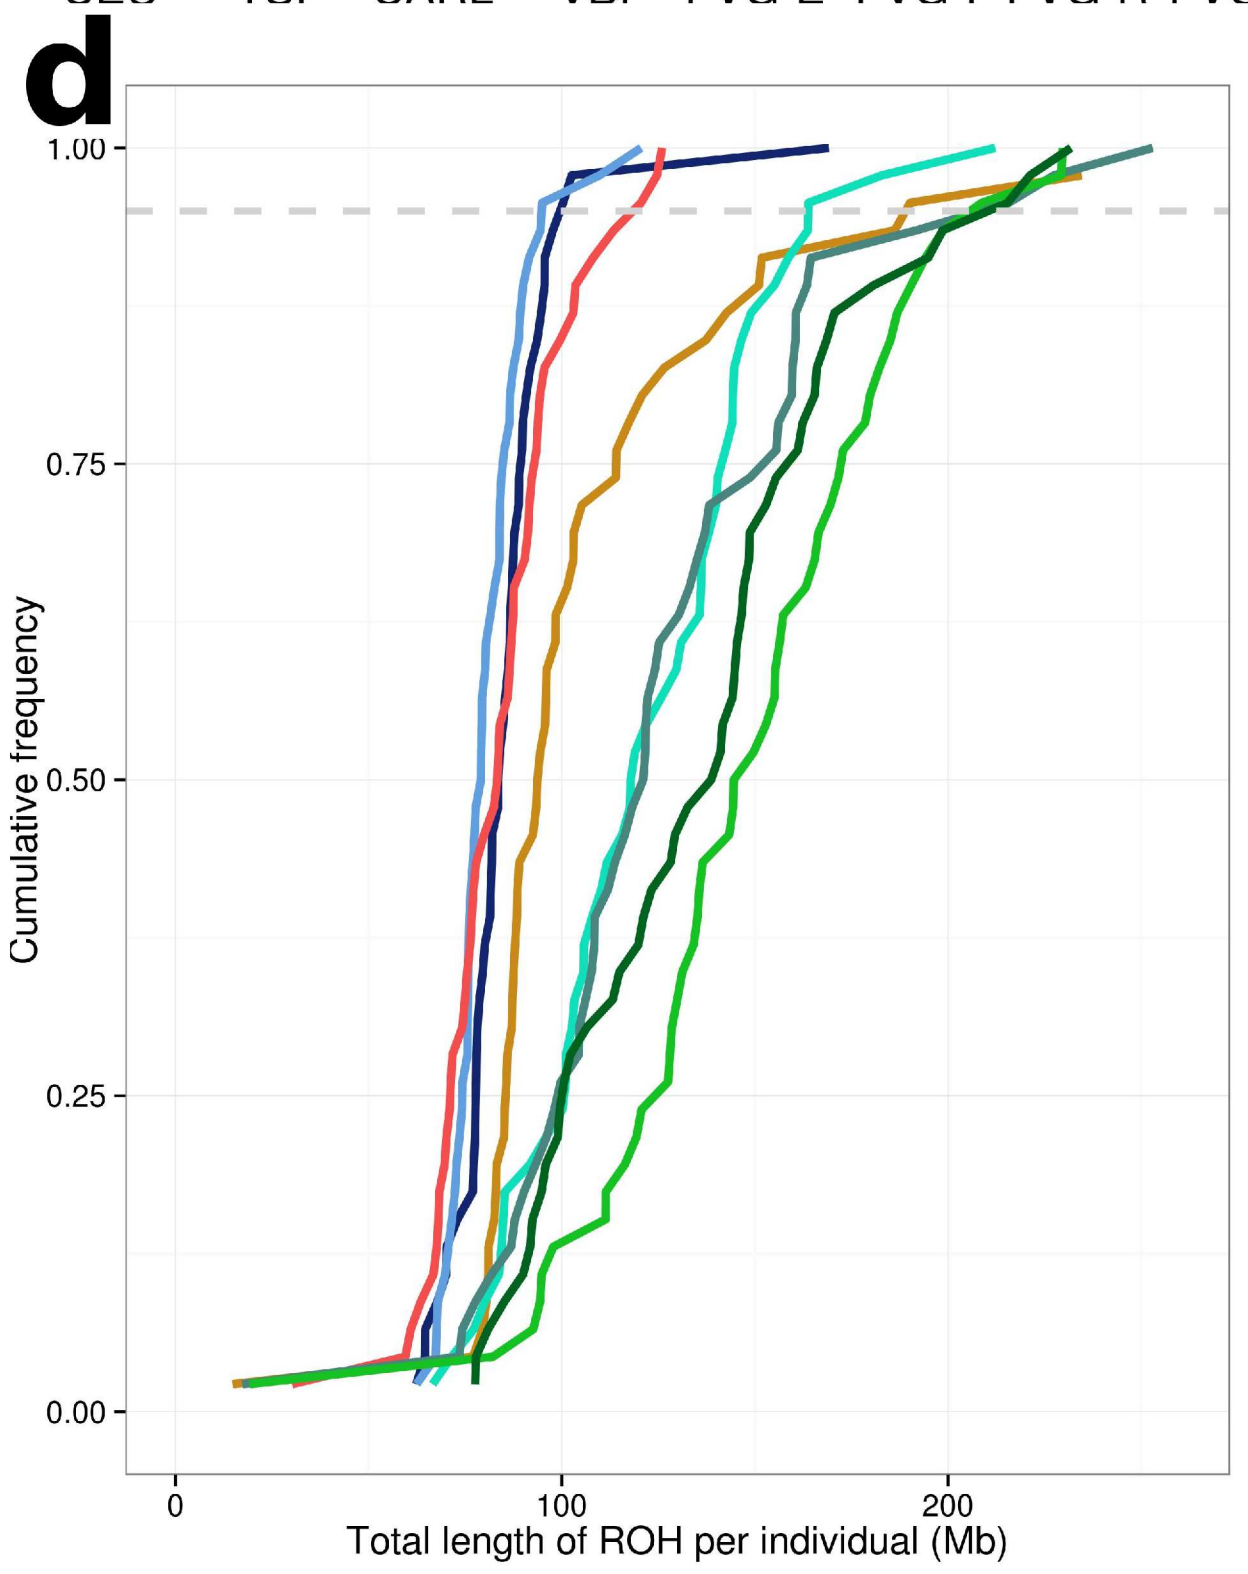

**a**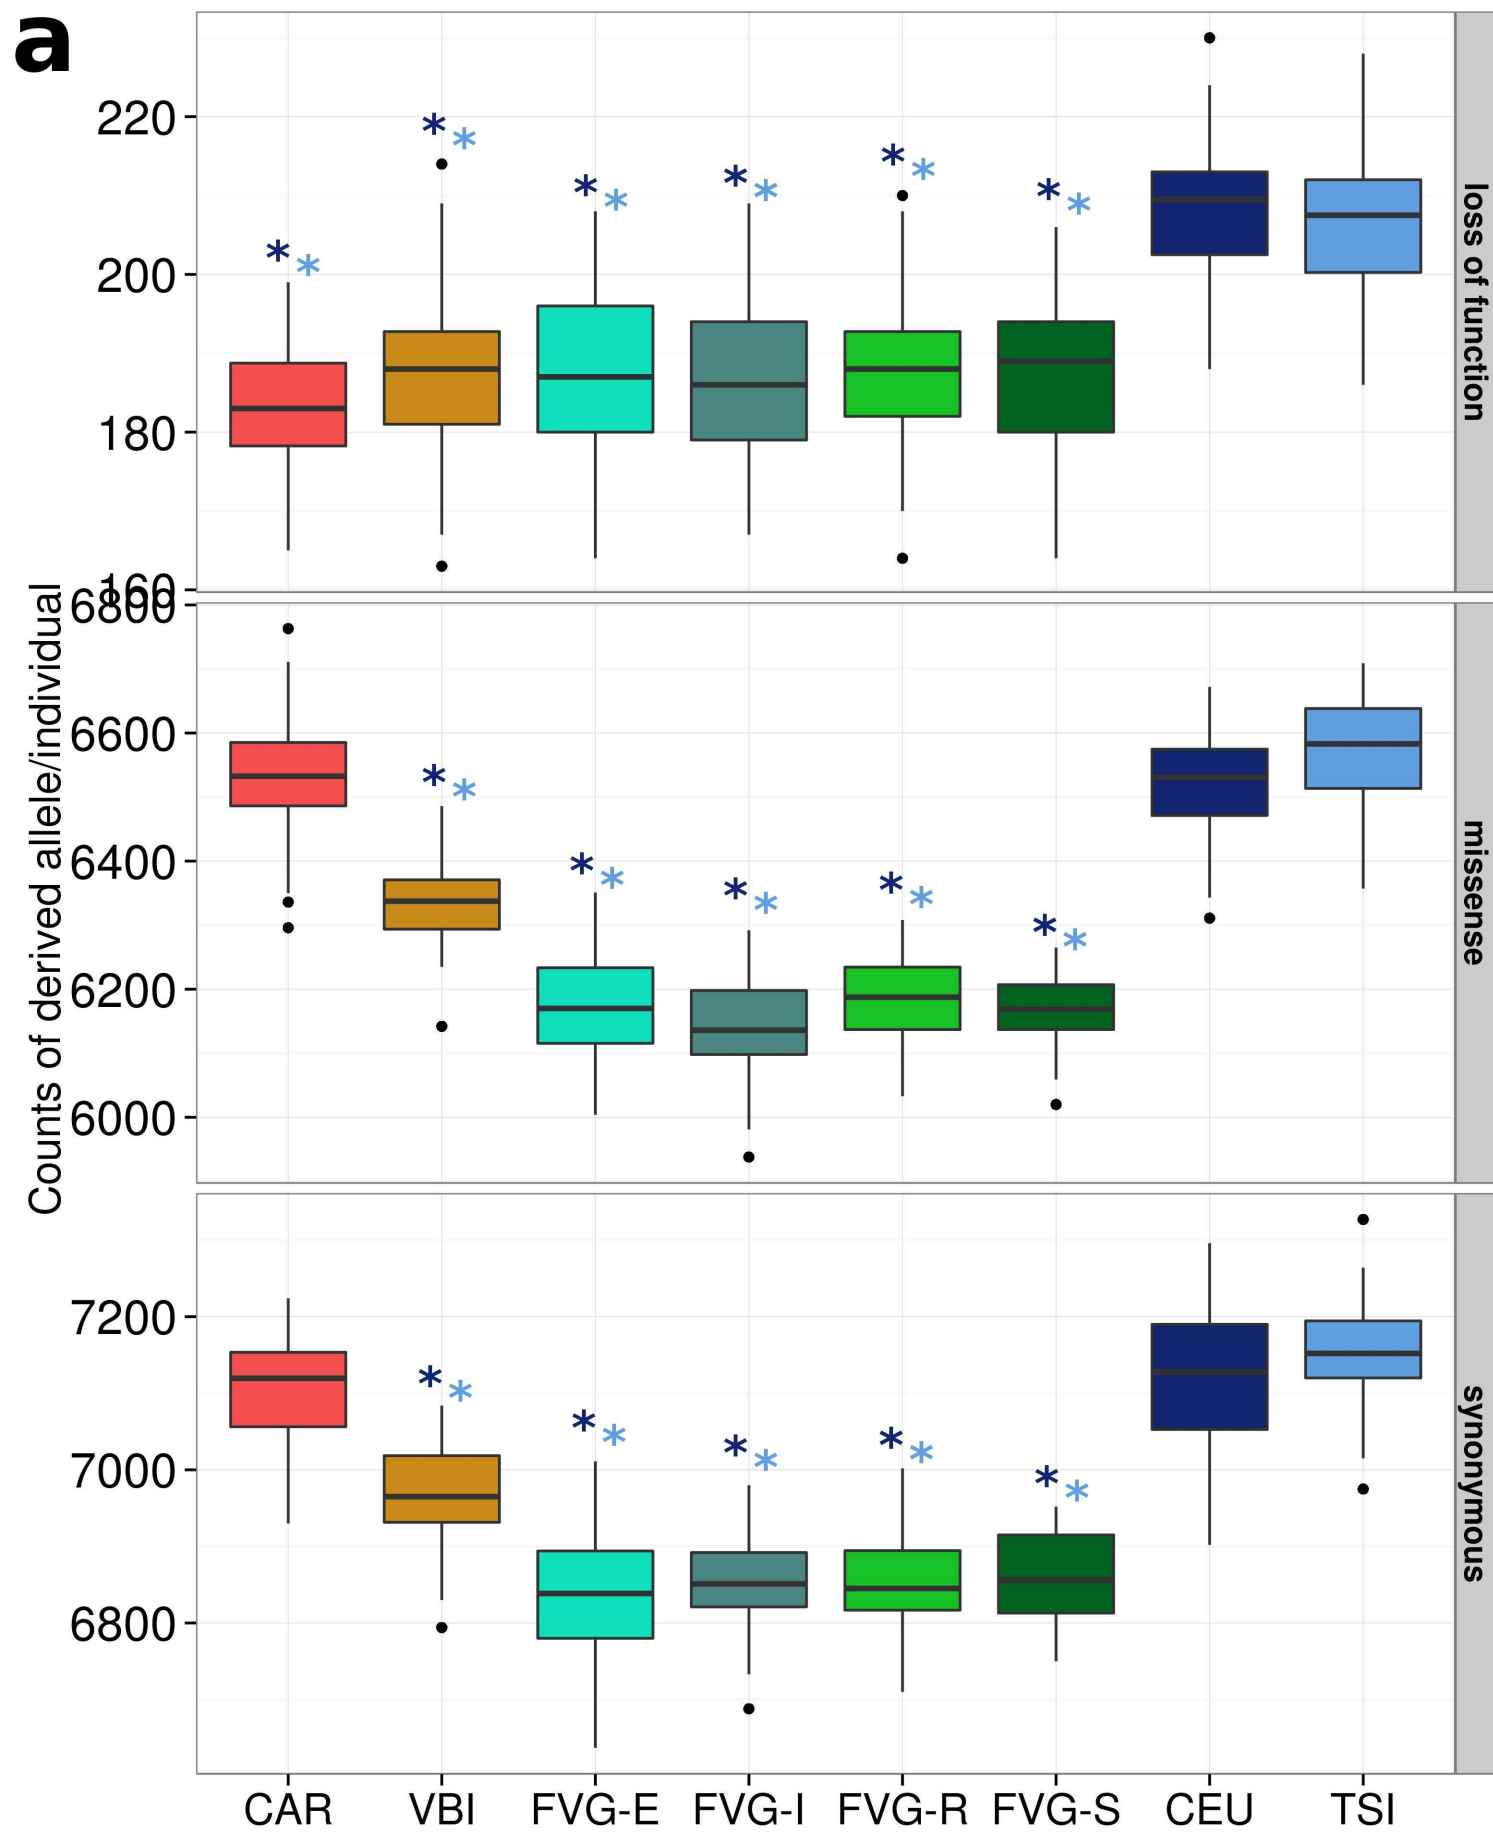**b**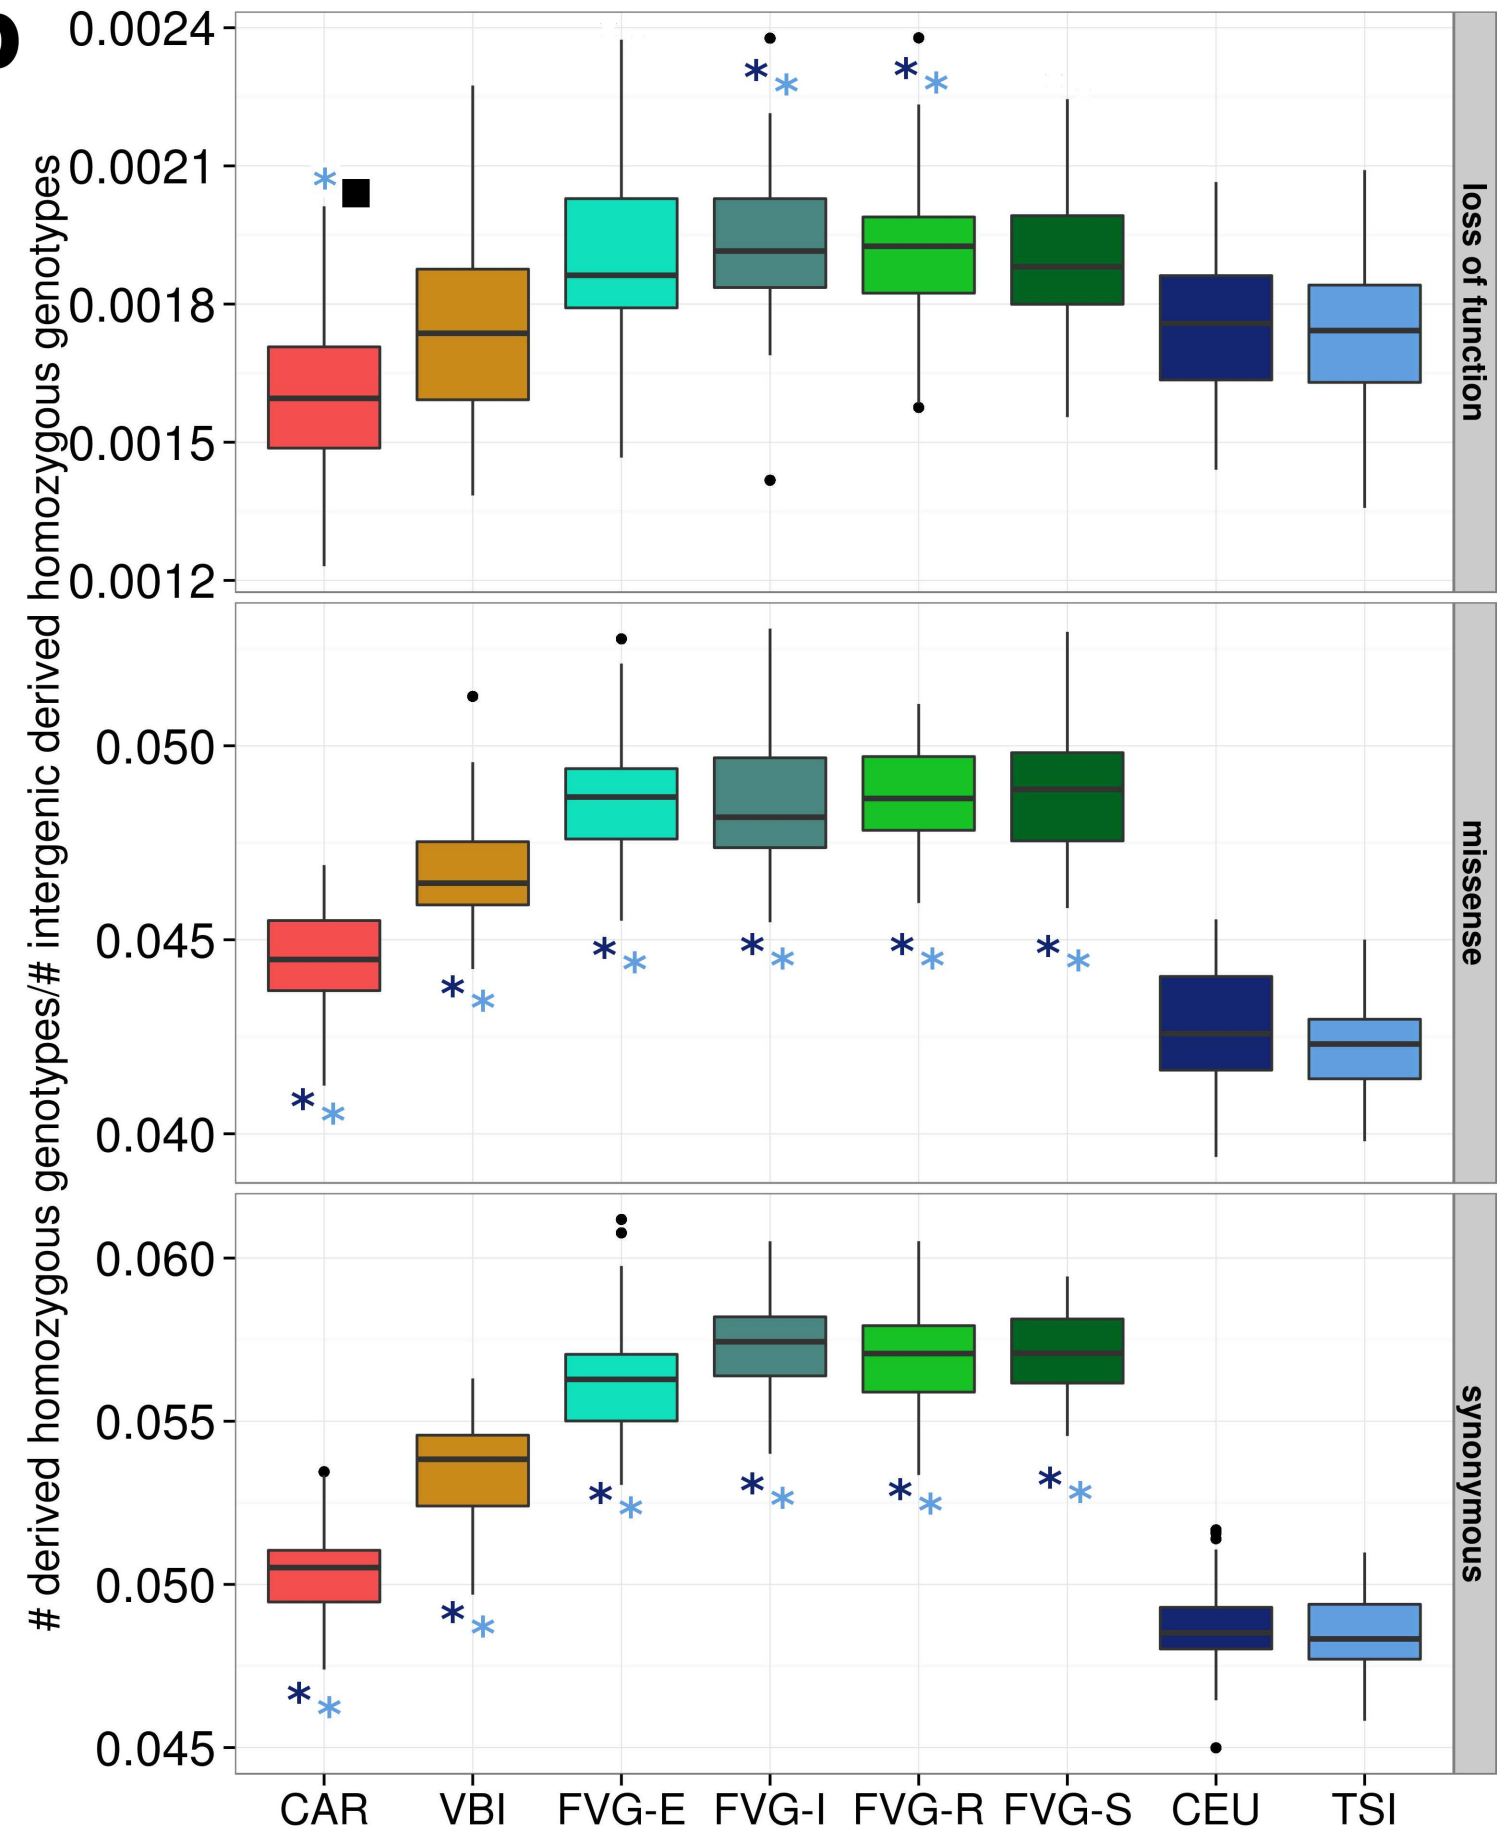



**a**

pop vs CEU

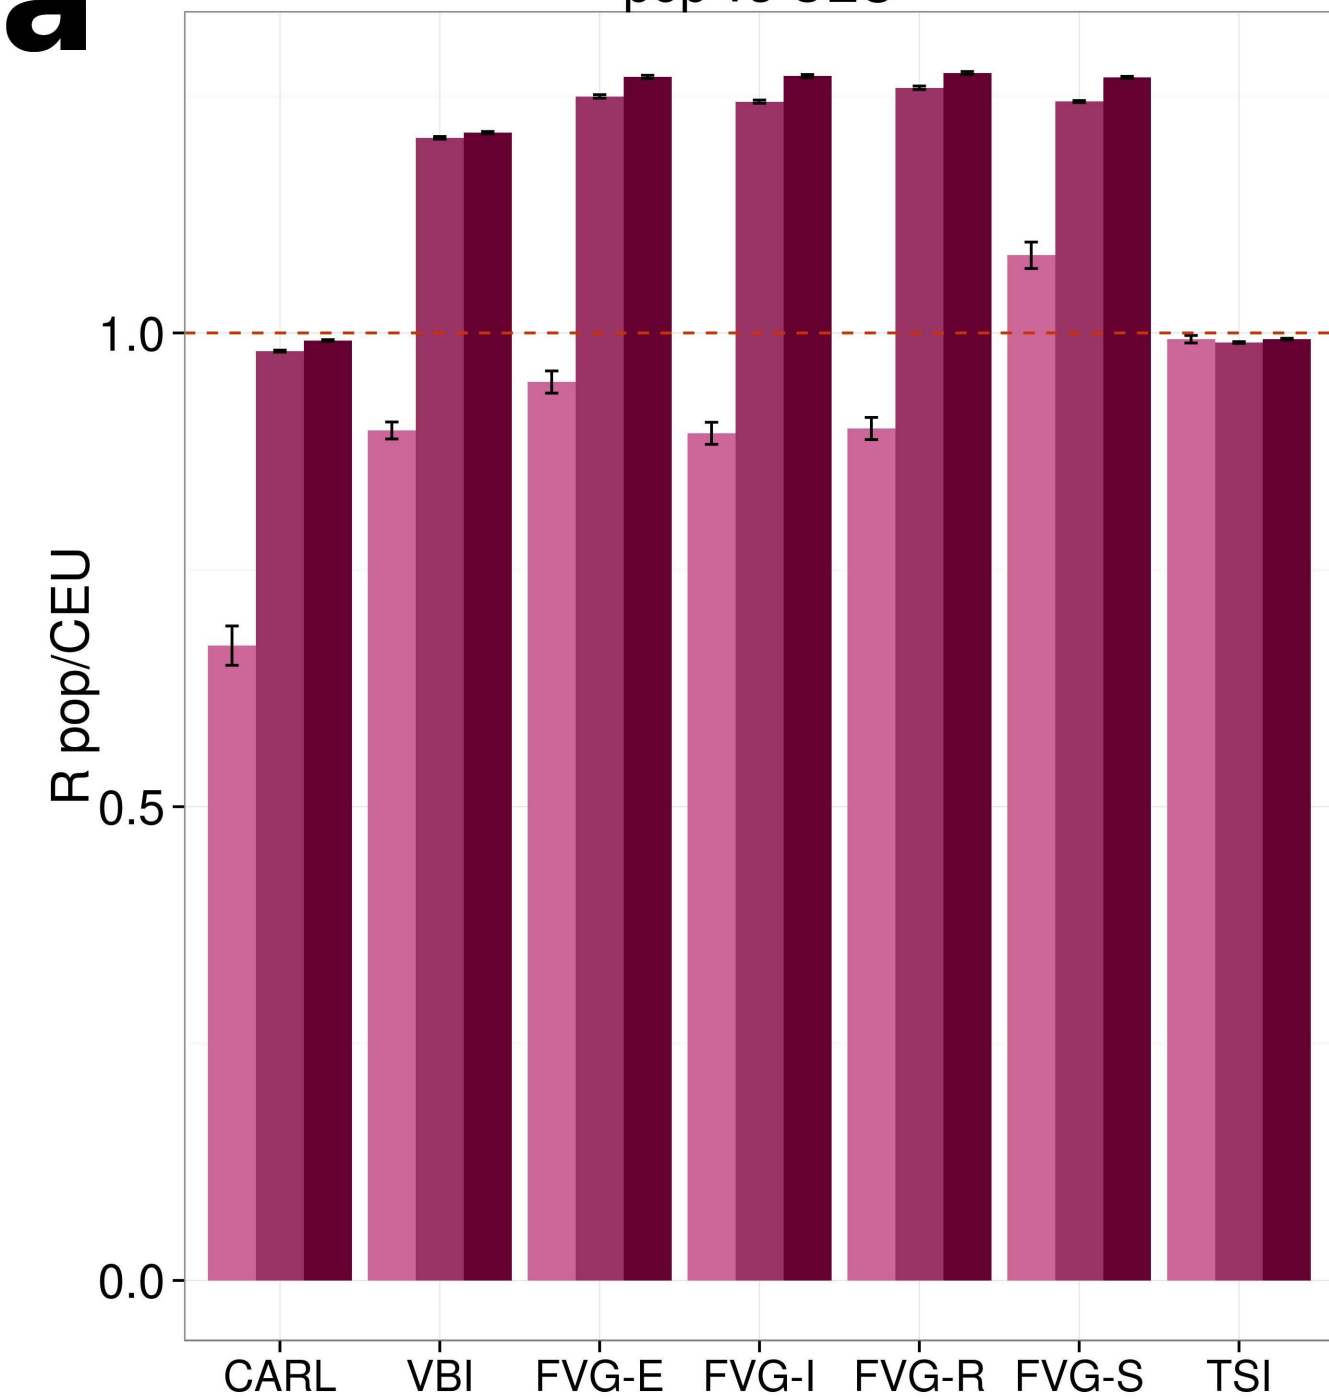**b**

pop vs TSI

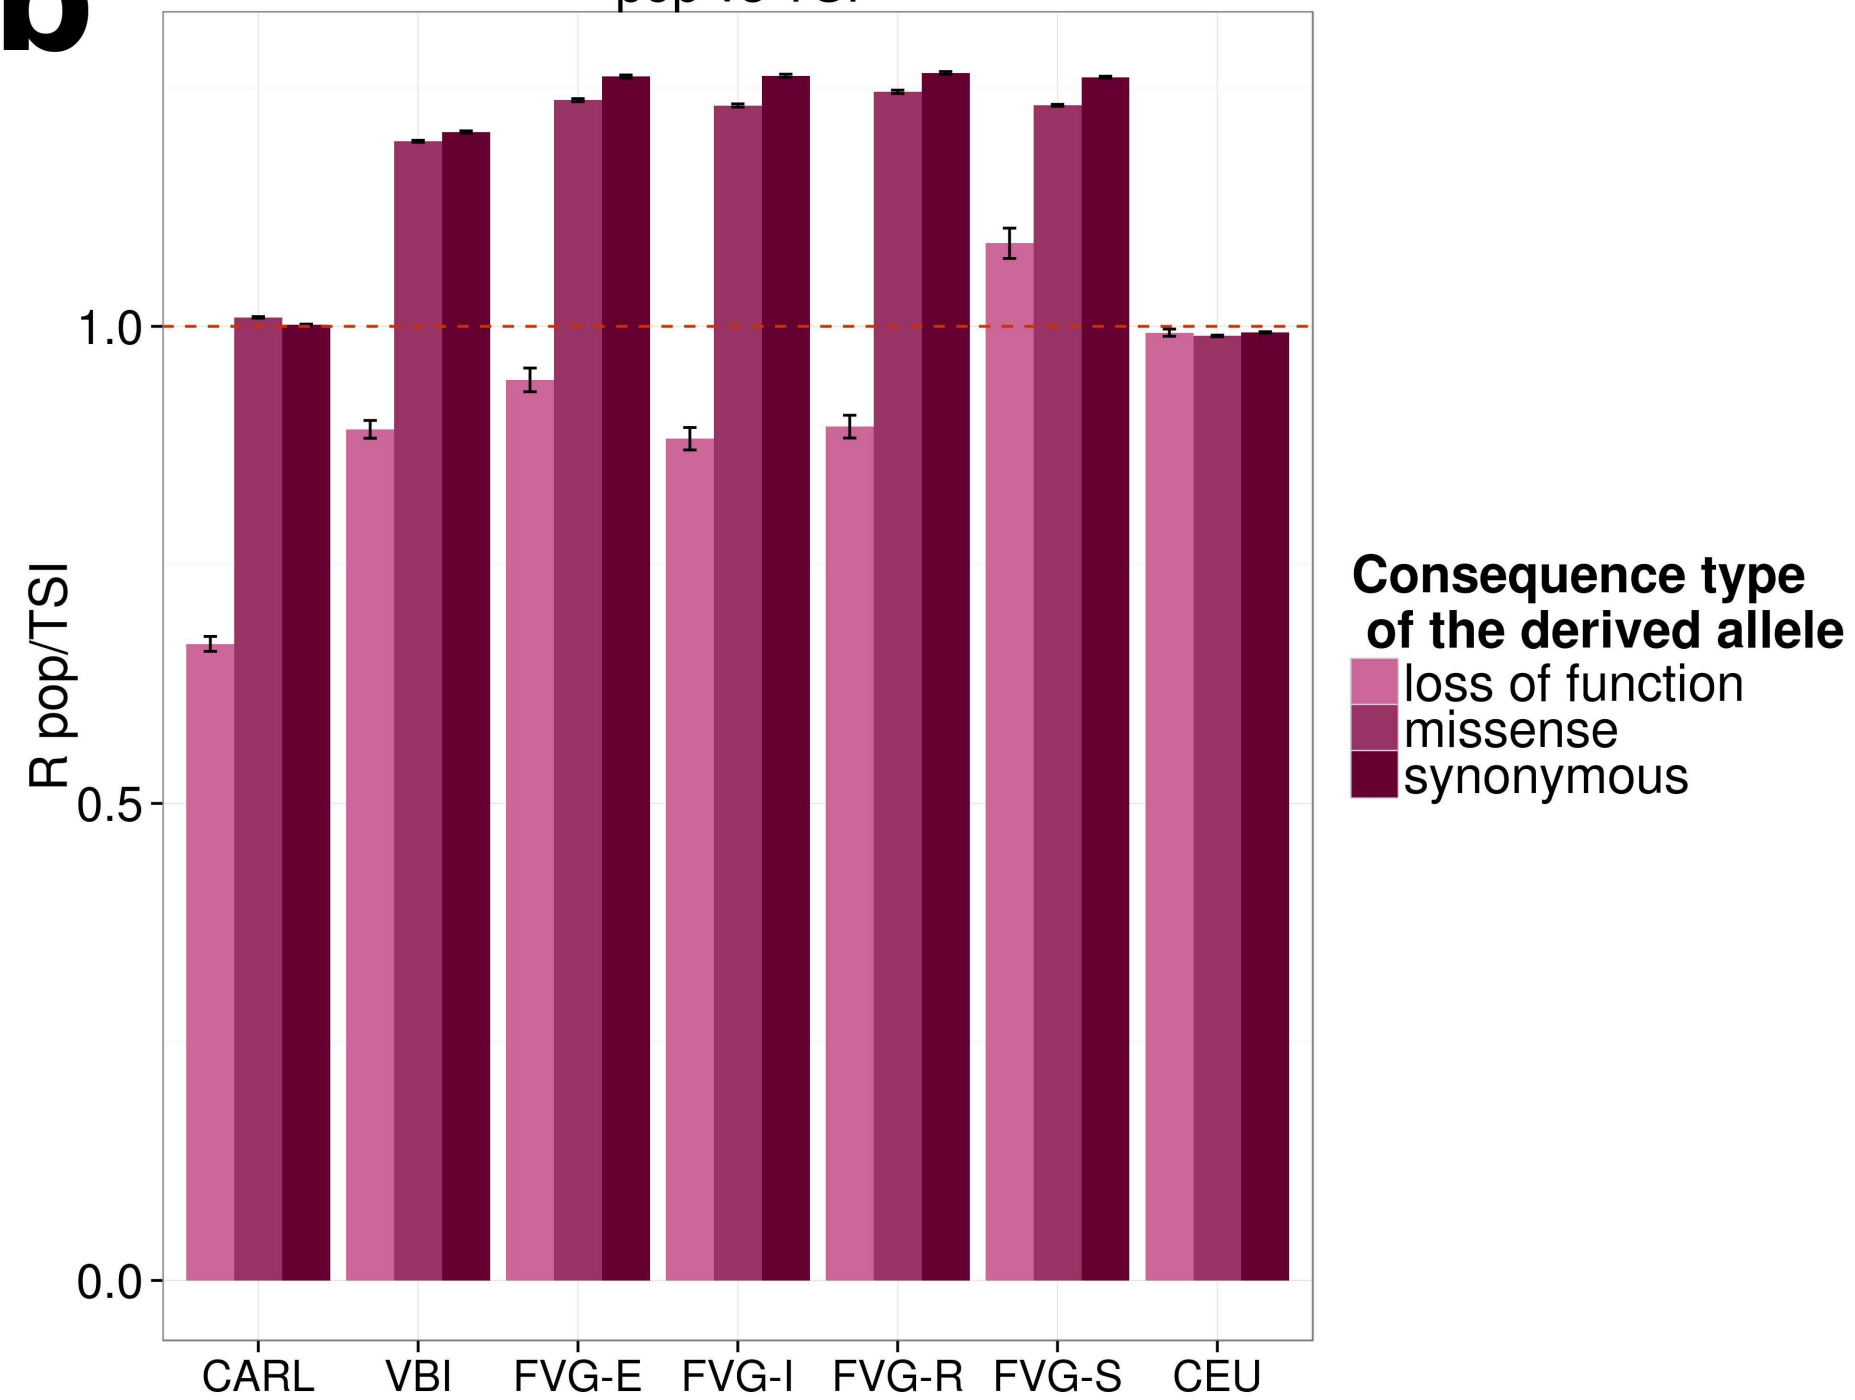

**Consequence type  
of the derived allele**

- loss of function
- missense
- synonymous

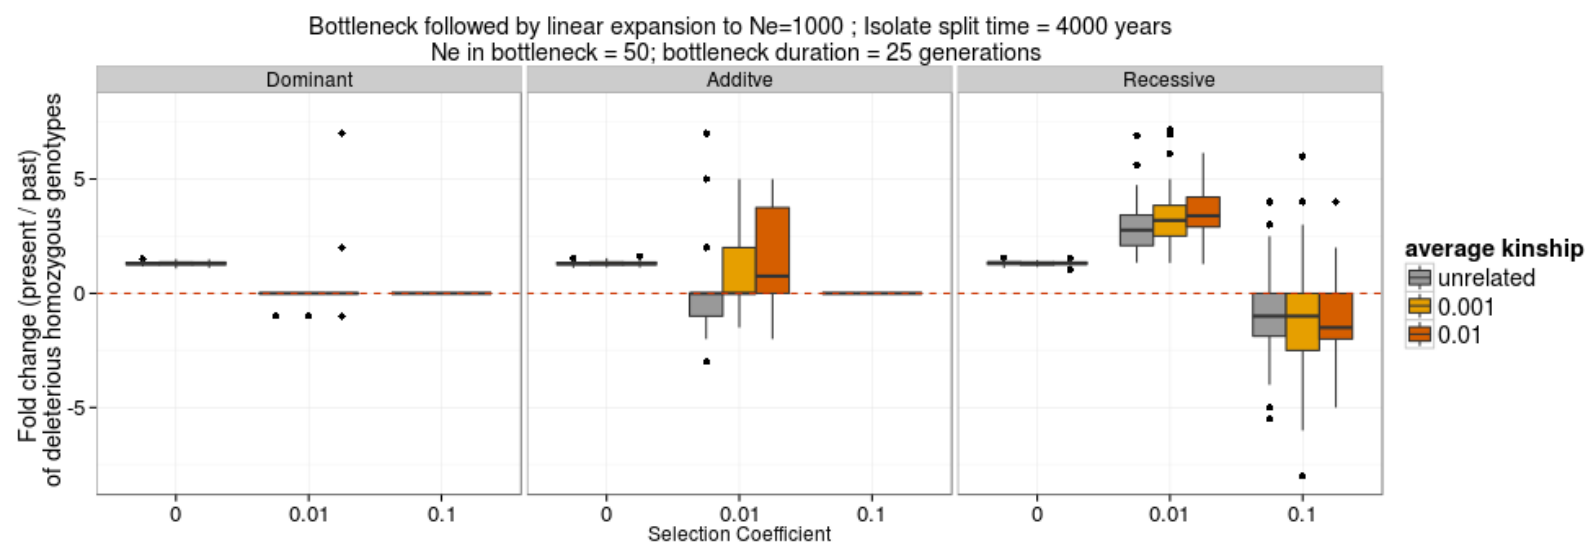

Figure-7\_Cocca\_etal

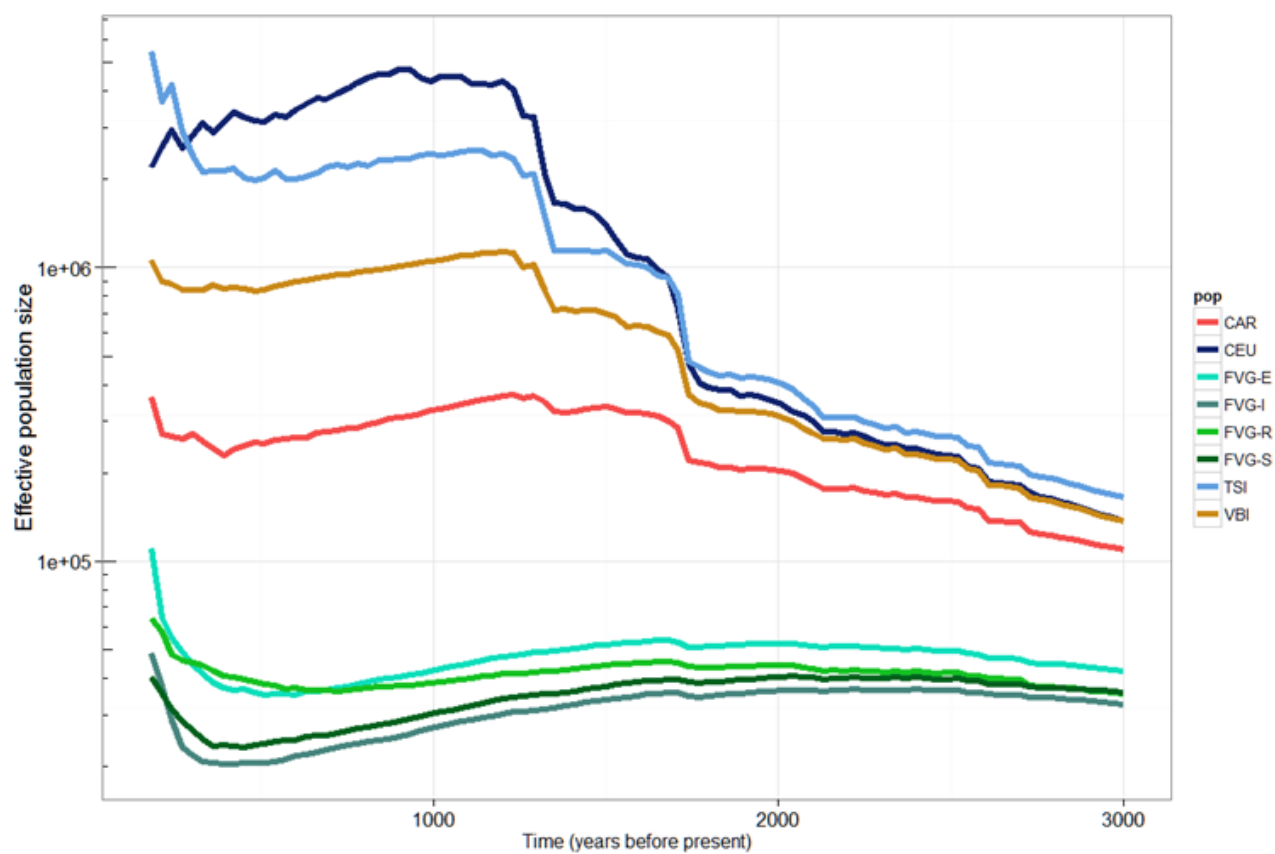

Source: http://biorxiv.org/content/10.1101/022947v1.full.pdf
